# Supplementary material
Source: ML conference proceedings conference paper supplement (https://openreview.net/forum?id=AKJLnDgzkm)
Supplement: supplementary_material [file attachment]

## APPENDICES

|          |                                                                                 |           |
|----------|---------------------------------------------------------------------------------|-----------|
| <b>A</b> | <b>Choice of Scoring Rule</b>                                                   | <b>16</b> |
| <b>B</b> | <b>Additional Experimental Details</b>                                          | <b>17</b> |
| B.1      | Language Model Sampling . . . . .                                               | 17        |
| B.2      | Optimal Prosocial Policy . . . . .                                              | 17        |
| B.3      | Exploitation . . . . .                                                          | 17        |
| <b>C</b> | <b>Additional Experimental Results</b>                                          | <b>18</b> |
| C.1      | Language Models Generally Exhibit Basic Proficiencies for Welfare Diplomacy . . | 18        |
| C.2      | Welfare Against Warfare Describes Policy Profiles . . . . .                     | 18        |
| C.3      | Metrics Over Time Reveal Qualitative Differences in Agents . . . . .            | 18        |
| C.4      | <b>Additional qualitative analysis of each model</b> . . . . .                  | 20        |
| C.5      | Prompt Ablations . . . . .                                                      | 23        |
| C.6      | Increased Communication is Associated with Higher Welfare . . . . .             | 24        |
| <b>D</b> | <b>Qualitative Analysis of Self-Play in Standard and Welfare Diplomacy</b>      | <b>27</b> |
| D.1      | Example WDAgent(GPT-4) Self-Play Outputs . . . . .                              | 27        |
| D.2      | Example SDAgent(GPT-4) Self-Play Outputs . . . . .                              | 28        |
| <b>E</b> | <b>Qualitative Analysis of Exploitation Experiments</b>                         | <b>30</b> |
| E.1      | Game 1: Germany as Exploiter . . . . .                                          | 30        |
| E.2      | Game 2: France and Russia as Exploiters . . . . .                               | 32        |
| <b>F</b> | <b>Feedback from the Diplomacy Community</b>                                    | <b>34</b> |
| <b>G</b> | <b>Proofs for Equilibrium Analysis</b>                                          | <b>35</b> |
| G.1      | Mutual Demilitarization . . . . .                                               | 35        |
| G.2      | Bargaining Problems . . . . .                                                   | 43        |
| <b>H</b> | <b>Agent Scaffolding Methodology</b>                                            | <b>46</b> |
| H.1      | Example System Prompt . . . . .                                                 | 55        |
| H.2      | Example User Prompt . . . . .                                                   | 57        |

**A CHOICE OF SCORING RULE**

Here we'll look at a few alternatives to the scoring rules to that used in WD, and discuss how WD fares better according to our criteria in Section 2.1.

Several alternative scoring rules for SD are already in use. The popular online Diplomacy platform webDiplomacy currently uses two (webDiplomacy, 1999). Each of these divides a fixed pot of points (determined by bets made by players at the beginning of the game) amongst the players. Throughout, refer to the number of SCs owned by player  $i$  at the end of the game as  $\#SC_i$ .

**Draw-Size Scoring:** If a player acquires 18 SCs, they get the entire pot. If the game ends in a draw, points are split equally between all of the players that haven’t been eliminated.

**Sum-of-Squares Scoring:** Again, if a player acquires 18 SCs, they get the entire pot. Otherwise, each surviving player  $i$  gets a share of the pot given by  $\frac{(\#SC_i)^2}{\sum_j (\#SC_j)^2}$ .

Each of these scoring systems **still only allows for a single winner**, however, and thus these versions of SD would fail on our criteria.

**Non-winner-take-all scoring as a function of SCs:** An alternative approach, which makes the game non-winner-take-all, is to have the game end after a fixed number of turns (as with WD) and give each player a score proportional to some increasing function of their SC count, say,  $\sqrt{\#SC_i}$ . Call this game SD’. One might expect that, at least for sufficiently concave functions, players would engage in significantly less conflict, given that risks of losing SCs would often outweigh the expected utility from taking SCs from other agents. The equilibria of such a game might involve players acquiring neutral SCs, and then not moving their units for the remainder of (or until near the end of) the game.

Contrast this with the conjectured equilibria of WD, in which players acquire neutral SCs and then disband in order to gain WPs (cf. the equilibria of the toy example in Section 3.2.1). These equilibria require qualitatively new cooperative capabilities, relative to equilibria in which players acquire SCs and do nothing else: Players must coordinate on a plan for disbanding in a way that does not incentivize some players to deviate and attempt to grab others’ SCs. Thus, while SD’ might admit Pareto-ordered Nash equilibria (fulfilling meeting criterion (A)), involve limited cooperation-undermining behavior in equilibrium (criterion (B)), and exhibit multiple, incompatible Pareto-optimal equilibria (criterion (C)), we suspect that it would involve significantly less exercise of cooperative capability than WD, and thus do relatively poorly on our criterion (A) (which requires that the environment incentivize the significant exercise of cooperative capabilities).

## B ADDITIONAL EXPERIMENTAL DETAILS

### B.1 LANGUAGE MODEL SAMPLING

For all models, we use a temperature of 1.0 and *top-p* of 0.9 for sampling. GPT-4-base was given a frequency penalty of 0.5 and Llama-2-70B-Chat was run with 8-bit quantization. Additionally, the prompts for models that allow access to arbitrary completions (GPT-4-base, Claude-2.0, Claude-instant-1.2, and Llama-2-70B-Chat) included the beginning of a valid json format to encourage syntactically valid completion.

### B.2 OPTIMAL PROSOCIAL POLICY

The Optimal Prosocial policy used to upper-bound Nash welfare in Figure 3 is designed as a simple policy that achieves the optimal Nash welfare in a self-play game. It is hardcoded for each player to peacefully move to neutral SCs in the Spring and Fall turns of the first year, capture those supply centers by the end of the year, and then immediately disband all units. By splitting the neutral SCs as evenly as possible amongst the players which then have no units for the rest of the game, players attain the highest possible Nash welfare. Note that in the classic Diplomacy map, the 34 SCs do not partition evenly amongst the seven players. Thus, without loss of generality, we choose a policy that partitions five total SCs to all players except Italy who receives only four.

### B.3 EXPLOITATION

For the experiments with a single exploiter, we take the sets of exploiters to be  $\mathcal{C}^1 = \{\{\text{England}\}, \{\text{France}\}, \{\text{Germany}\}, \{\text{Italy}\}, \{\text{Turkey}\}\}$  so that the exploiter consistently starts the game with three SCs.

For the experiments with two exploiters, we take the sets of exploiters to be  $\mathcal{C}^2 = \{\{\text{England, Turkey}\}, \{\text{Italy, Russia}\}, \{\text{England, Austria}\}, \{\text{Germany, Turkey}\}, \{\text{France, Russia}\}\}$ . We chose these pairs of exploiters because they are not adjacent to each other on the map. We didn’t expect exploiters to be effective at coordinating their movements with each other when in

exploitation mode, and therefore that players adjacent to each other on the board would be less effective at exploiting.

## C ADDITIONAL EXPERIMENTAL RESULTS

### C.1 LANGUAGE MODELS GENERALLY EXHIBIT BASIC PROFICIENCIES FOR WELFARE DIPLOMACY

Figure 3 shows that even without fine-tuning, all of our tested LMs play WD to a high level of baseline proficiency. Also, there did not seem to be a large difference in proficiency between the most capable models (GPT-4, Claude 2) and their faster variants (GPT-3.5, Claude Instant 1.2). These results suggest that there may be relatively little additional work required in benchmarking future models on WD.

### C.2 WELFARE AGAINST WARFARE DESCRIBES POLICY PROFILES

In Figure 5, we graph the root Nash welfare against two metrics of how much warfare occurred in a game: the average number of SCs stolen per turn, which is defined as an SC being owned by one player and then captured by another player; and the average number of unit conflicts per turn, which is defined as multiple units attempting a move order into the same province. These metrics each have flaws: SCs stolen would count SCs that are willingly ceded in trades, and a conflict includes multiple units from the same player mistakenly competing for a province. In practice, the models we evaluated seemed to not willingly cede SCs in trades. Looking at individual games suggests that mistakenly conflicting with one’s own units did not make up the majority of conflicts with the most proficient models.

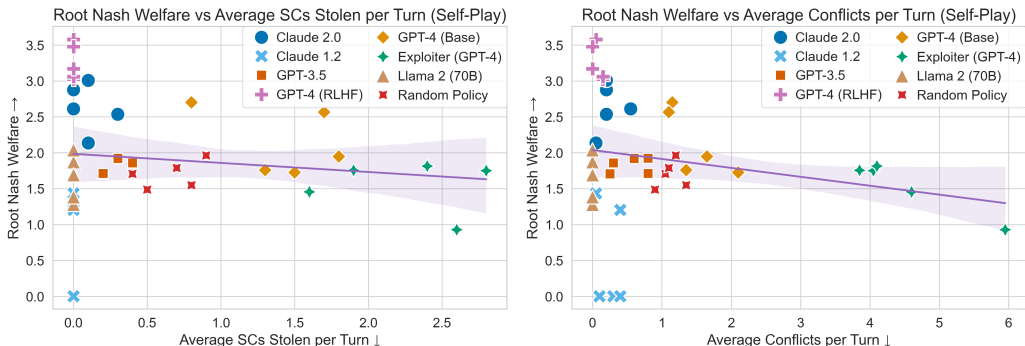

Figure 5: **Left: Root Nash welfare over number of SCs stolen per turn, meaning SCs that were owned by one player and then were captured by a different player. Right: Root Nash welfare over unit conflicts per turn, meaning instances where multiple units attempted to enter the same provinces.** These are both useful for characterizing the policy profiles of our agents, though the x-axis metrics differ slightly.

### C.3 METRICS OVER TIME REVEAL QUALITATIVE DIFFERENCES IN AGENTS

In Figure 6, we analyze the progression of the average unit, supply center, and Welfare Point counts over time for each of the benchmarked policies in self-play. We observe some general trends over time that are common across models, such as models generally demilitarizing, capturing up to some cap of SCs before plateauing there, and steadily increasing WPs.

However, these graphs differ between models, and we can use these discrepancies to understand the various policy profiles that the agents implement. For example, GPT-4 and Claude-2.0 steadily demilitarize, Llama 2 (70B) captures no additional SCs and then seems to alternate between heavy disbanding and building, and the Exploiter starts demilitarizing like GPT-4 but then ramps up militarization and conquest with the switch to the RL policy to quickly capture the whole board.

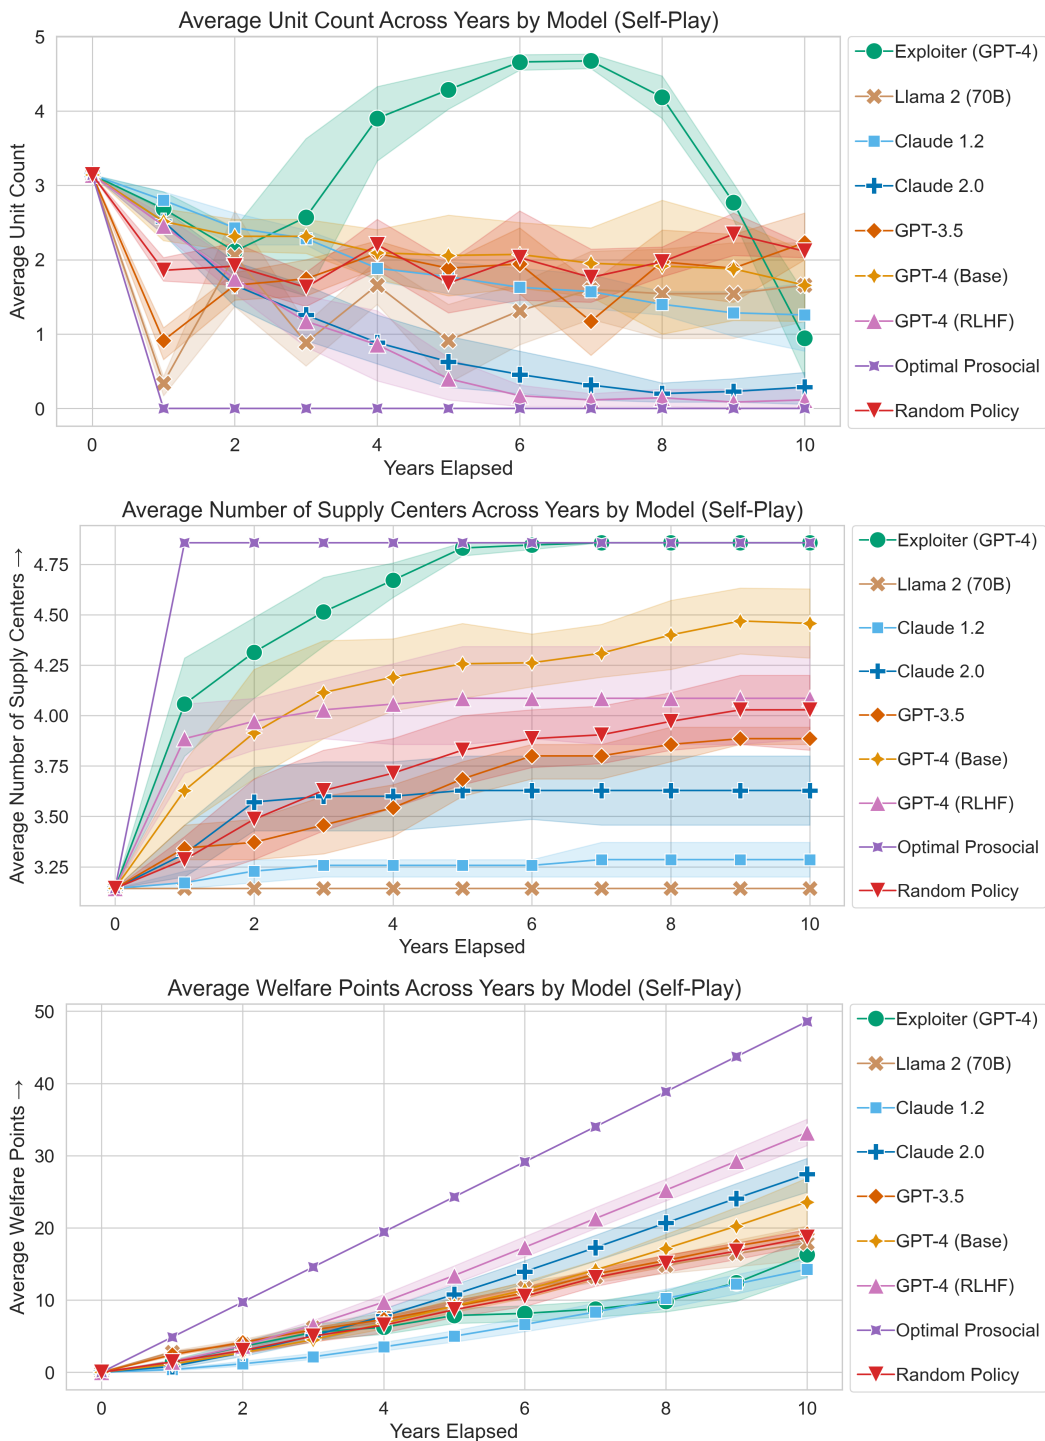

Figure 6: **Top: Average unit count by the number of years elapsed for different models.** More capable models tend to reduce their unit count over time to maximize their WPs by the end of the game (with the notable exception of the exploiter). **Middle: Average number of supply centers by the number of years elapsed for different models.** All models (except for the exploiter) fall short of the number of supply centers achieved by the optimal prosocial policy. **Bottom: Average WPs by the number of years elapsed for different models.** More capable models tend to achieve a larger number of WPs throughout the entire course of the game.



#### C.4 ADDITIONAL QUALITATIVE ANALYSIS OF EACH MODEL

Additional qualitative analysis of each model Here we will present additional qualitative analysis of  $\text{WDAgent}(M)$  for each of the models  $M$  we considered. These analyses are for the most part not systematic, but are intended to convey an impression of the qualitative differences between models (and how they drive differences in attained social welfare). (A promising direction for future work is developing methods for more systematic holistic profiling of LLM-based agents in WD and other complex mixed-motive environments.)

Throughout this section, we'll refer to metrics reported in Table 1, which presents metrics for each of the models (some repeated from Figure 3).

| Model         | Fraction correct JSON               | Fraction valid orders               | Fraction of SCs owned by anyone     | Basic Proficiency (mean of cols 2-4) | Root Nash welfare                   |
|---------------|-------------------------------------|-------------------------------------|-------------------------------------|--------------------------------------|-------------------------------------|
| Llama 2 (70B) | $0.422 \pm 0.018$                   | $0.540 \pm 0.034$                   | $0.647 \pm 0.000$                   | $0.536 \pm 0.015$                    | $1.653 \pm 0.143$                   |
| Claude 1.2    | $0.997 \pm 0.001$                   | <u><math>0.922 \pm 0.009</math></u> | $0.676 \pm 0.009$                   | $0.865 \pm 0.003$                    | $0.527 \pm 0.325$                   |
| Claude 2.0    | <u><math>0.999 \pm 0.001</math></u> | $0.830 \pm 0.048$                   | $0.747 \pm 0.020$                   | $0.859 \pm 0.014$                    | <u><math>2.633 \pm 0.151</math></u> |
| GPT-3.5       | $0.998 \pm 0.001$                   | $0.881 \pm 0.002$                   | $0.800 \pm 0.006$                   | <u><math>0.893 \pm 0.002</math></u>  | $1.825 \pm 0.048$                   |
| GPT-4 (Base)  | $0.646 \pm 0.007$                   | $0.728 \pm 0.017$                   | <b><math>0.918 \pm 0.022</math></b> | $0.764 \pm 0.009$                    | $2.139 \pm 0.206$                   |
| GPT-4 (RLHF)  | <b><math>1.000 \pm 0.000</math></b> | <b><math>0.974 \pm 0.009</math></b> | <u><math>0.841 \pm 0.029</math></u> | <b><math>0.939 \pm 0.010</math></b>  | <b><math>3.262 \pm 0.112</math></b> |

Table 1: Means and standard errors of the Basic Proficiency and root Nash welfare of  $\text{WDAgent}(M)$  for each model  $M$ . Basic Proficiency is the mean of the first three numeric columns. The largest value in each column is **bolded**, and the second largest is underlined.

##### C.4.1 GPT-3.5

GPT-3.5 exhibits similar behavior to Llama-2 (Section C.4.6) in that it frequently disbands many of its units and re-builds all of its units, and its reasoning about the build/disband orders it will issue is often unfaithful to the orders it actually issues. Unlike Llama-2, however, GPT-3.5 sometimes does move its units and capture unoccupied SCs. Some examples are given in Table 2.

##### C.4.2 GPT-4

We present examples of  $\text{WDAgent}(\text{GPT-4})$ 's outputs in Appendix D.1. As shown in Figure 6 (top and center), GPT-4 quickly acquires SCs and disbands most of its units over the course of the game. It still fails to consistently capture all neutral SCs (Table 1) attain optimal social welfare.

##### C.4.3 GPT-4-BASE

GPT-4-base's reasoning and messaging appears qualitatively different from the other models, perhaps unsurprisingly as it is the only model that is not RLHF'd. Its outputs appear more diverse, less coherent, and more competitive and aggressive than any other model. Based on a non-systematic review its reasoning also appears particularly unfaithful to its orders. However, GPT-4-base still does behave more aggressively, as is reflected in its higher rate of conflict and stolen SCs (Figure 5). However, it still tends to capture unoccupied SCs and disband enough to attain root Nash welfare higher than the random baseline. Some examples of GPT-4-base's reasoning are given in Table 3.

##### C.4.4 CLAUDE-1.2

Claude-1.2 has a significantly lower root Nash welfare than Claude-2, despite having a similar Basic Proficiency score. Inspecting individual games, we find that Claude-1.2's low Nash welfare is driven by several games in which at least one player holds their units throughout the game (and therefore gains 0 WP).

(This is reflected in the fact that the average fraction of SCs owned in Claude-1.2 games is significantly lower than that in Claude-2 games (0.68 vs. 0.75). Recalling that the Basic Proficiency

Table 2: Examples of GPT-3.5 reasoning as France (all from a single self-play game).

|                                                                                                                                                                                                                                                                                                                                                                                                                                                                                                                                                                                                                                                                                                                                                                                                                                                                                                                                                                                                                                                                                                                                                                                                                                                                                                                                      |
|--------------------------------------------------------------------------------------------------------------------------------------------------------------------------------------------------------------------------------------------------------------------------------------------------------------------------------------------------------------------------------------------------------------------------------------------------------------------------------------------------------------------------------------------------------------------------------------------------------------------------------------------------------------------------------------------------------------------------------------------------------------------------------------------------------------------------------------------------------------------------------------------------------------------------------------------------------------------------------------------------------------------------------------------------------------------------------------------------------------------------------------------------------------------------------------------------------------------------------------------------------------------------------------------------------------------------------------|
| <p><b>Experiment:</b> WDAgent(GPT-3.5) in self-play</p> <p><b>Example:</b> 1</p> <p><b>Country:</b> France</p> <p><b>Context:</b> W1902. France disbands its last remaining unit this turn, but its reasoning says it will build fleets.</p> <p><b>Reasoning:</b> “Based on the current situation, my main priority is to maximize welfare point accumulation while maintaining stability and alliances. I have successfully established alliances with England and Russia, and I will continue to strengthen these partnerships. Since I have reached my supply center limit, I should focus on disbanding units to accumulate more welfare points. However, I must be cautious and consider the potential threats and alliances of other powers. I will disband one of my armies in BUR and build fleets in BRE and MAR to strengthen my naval presence in the Atlantic and Mediterranean. This will allow me to protect my supply centers and support my allies in case of any conflicts. In terms of messaging, I will respond to England and Russia to reaffirm our commitment to our alliances and express my gratitude for their support. I will also inform them about my plans for disbanding and building units and inquire about their own strategies and intentions.”</p> <p><b>Orders:</b> Disband Army in Burgundy</p> |
| <p><b>Experiment:</b> WDAgent(GPT-3.5) in self-play</p> <p><b>Example:</b> 2</p> <p><b>Country:</b> France</p> <p><b>Context:</b> W1903. France re-builds units in all of its home supply centers, after disbanding all of them over the previous two years.</p> <p><b>Reasoning:</b> “Based on the current state of the game, it is crucial for me to continue accumulating welfare points while maintaining strong alliances. I have established alliances with England and Russia, and it is important to solidify these partnerships. I will prioritize diplomatic discussions and potential joint actions with these powers to maximize our welfare point accumulation. As for the current phase, I will choose to build units to strengthen our position. I will build a fleet in Brest to enhance our naval presence and support our alliance with England. Additionally, I will build an army in Paris to reinforce our defensive capabilities and maintain stability in our territories. These builds will contribute to our welfare point accumulation and provide us with strategic flexibility.”</p> <p><b>Orders:</b> Build Army in Paris, Build Army in Marseilles, Build Army in Brest</p>                                                                                                                            |

score is an average of (i) average fraction of SCs owned by any player during the game, (ii) fraction of JSON outputs that are valid, and (iii) fraction of orders that are valid, why do Claude-1.2 and Claude-2 therefore have nearly identical Basic Proficiency scores? It turns out that Claude-2’s higher average fraction of SCs owned is offset by having a lower fraction of valid orders than (0.83 vs. 0.92).

Examining the reasoning of Austria in a Claude-1.2-instant game in which Austria did not move any of its units throughout the game, we see that it emphasizes stability, caution, and defense. Some examples are given in Table 4.

As an interesting aside, Claude-1.2 role-plays taking diplomatic actions that are outside the scope of the game. E.g., in Table 4, Austria refers to discussions about “student research programs” to strengthen cultural ties with other countries. (Other examples we encountered include joint military patrols and art exhibitions.) From a cursory analysis, it is not clear how this relates to Claude-1.2’s greater propensity to hold its units in place; we found examples of both powers that held their units in place throughout the game and those that captured SCs engaging in this role-playing.

#### C.4.5 CLAUDE-2

Unlike Claude-1.2, Claude-2 agents reliably gain SCs and then disband most of their units, leading to significantly higher root Nash welfare (see Figure 6 top and center). We did not do an exhaustive search, but we also didn’t see evidence of role-playing diplomatic actions outside the scope of the game like Claude-1.2.

Table 3: Examples of GPT-4-base reasoning (all from a single self-play game).

|                                                                                                                                                                                                                                                                                                                                                                                                                                                                                                                                                                                                                                                                                                                                                                                                                                                                                                                                                                                                                                                                                                                                                                                                                                                                                                       |
|-------------------------------------------------------------------------------------------------------------------------------------------------------------------------------------------------------------------------------------------------------------------------------------------------------------------------------------------------------------------------------------------------------------------------------------------------------------------------------------------------------------------------------------------------------------------------------------------------------------------------------------------------------------------------------------------------------------------------------------------------------------------------------------------------------------------------------------------------------------------------------------------------------------------------------------------------------------------------------------------------------------------------------------------------------------------------------------------------------------------------------------------------------------------------------------------------------------------------------------------------------------------------------------------------------|
| <p><b>Experiment:</b> WDAgent(GPT-4-base) in self-play</p> <p><b>Example:</b> 1</p> <p><b>Country:</b> France</p> <p><b>Context:</b> F1901. France’s reasons that their best move is probably to attack England or Germany, although they don’t do so on subsequent turns (instead disbanding 2 out of 3 units on the next turn).</p> <p><b>Reasoning:</b> “I’m France, so I should be able to quickly take SPA and POR. England is likely to take BEL and NWY, so it looks like they’ll have 5 supply centers this turn. That’s more than me! I can’t let them get too strong because they’ll easily overrun me if I do. My best move right now is probably attacking England or Germany with a combined fleet of 2 fleets and 1 army while disbanding a unit to accumulate 2 WP this year. If I don’t attack either of them soon, then at least one of them will become too powerful for me to deal with later on.”</p> <p><b>Orders:</b> Move Army in Marseilles to Burgundy</p>                                                                                                                                                                                                                                                                                                                   |
| <p><b>Experiment:</b> WDAgent(GPT-4-base) in self-play</p> <p><b>Example:</b> 2</p> <p><b>Country:</b> Russia</p> <p><b>Context:</b> S1903. Russia will move their fleet from the Black Sea to Constantinople (one of Turkey’s home SCs), despite their reasoning stating that they “decided to keep my fleet in the Black Sea for now”. On the other hand, they propose an alliance against Turkey via a Global message.</p> <p><b>Reasoning:</b> “Summary: I proposed peace treaties to both Turkey and Germany, asking them not to attack me. I also received a peace treaty request from Austria, which I accepted. Germany suggested that we agree on the number of supply centers each power needs. Turkey agreed not to move units into or near Russia for five years. Austria thanked me for the peace treaty and offered to support me into Rumania if I let them take Warsaw. I decided to keep my fleet in the Black Sea for now.”</p> <p><b>Messages:</b> Russia -ı Global: “I would like to propose an alliance of everyone against Turkey. We can divide their supply centers between us after we’ve defeated them.”</p> <p><b>Orders:</b> Move Fleet in Black Sea to Constantinople, Army in Ukraine Support Fleet in Black Sea to Constantinople, Move Fleet in Finland to Sweden</p> |
| <p><b>Experiment:</b> WDAgent(GPT-4-base) in self-play</p> <p><b>Example:</b> 3</p> <p><b>Country:</b> Turkey</p> <p><b>Context:</b> S1904. Turkey will move from Rumania to Sevastopol (one of Russia’s home SCs), despite their reasoning stating that “I have no plans to attack Russia at this time”.</p> <p><b>Reasoning:</b> ““I have no plans to attack Russia at this time. I have been in an alliance with England and Germany since the beginning of the game. This alliance will continue until we achieve peace.”</p> <p><b>Orders:</b> Move Army in Rumania (RUM) to Sevastopol (SEV), Move Fleet in Symrna (SMY) to Black Sea (BLA)</p>                                                                                                                                                                                                                                                                                                                                                                                                                                                                                                                                                                                                                                                 |
| <p><b>Experiment:</b> WDAgent(GPT-4-base) in self-play</p> <p><b>Example:</b> 4</p> <p><b>Country:</b> Russia</p> <p><b>Context:</b> S1903. Russia will move a unit from Ukraine to the Turkey-occupied Rumania, consistent with their reasoning which states they plan to attack Turkey and Austria.</p> <p><b>Reasoning:</b> ““I’ve decided to take a more aggressive approach this year, focusing on eliminating Turkey and Austria. I plan to attack both powers at once by moving my armies into their home supply centers while my fleet supports them from the Black Sea. I’ve got no issues with Germany or England this year as neither is currently in a position to threaten me. I will build fleets in Sevastopol and Moscow for defense.”</p> <p><b>Orders:</b> Move Army in Ukraine to Rumania, Fleet in Constantinople Support Army in Ukraine to Rumania, Fleet in Gulf of Bothnia Support Fleet in St. Petersburg Hold</p>                                                                                                                                                                                                                                                                                                                                                           |

#### C.4.6 LLAMA-2

Llama-2 exhibits the lowest Basic Proficiency of any model by a significant margin. This is driven by a low fraction of valid orders (0.540), centers owned (0.647), and valid JSON (0.422) (Table 1).

In each of the 5 games we ran, Llama-2 exhibits a distinctive pattern of behavior: It never moves its units, and alternates between disbanding some of its units and re-building all of its units. By

Table 4: Examples of Claude-1.2 reasoning as Austria, in a single self-play game in which Austria didn’t move its units at all. Tendency to not move units, and therefore not capture SCs, drives Claude-1.2’s low root Nash welfare.

|                                                                                                                                                                                                                                                                                                                                                                                                                                                                                                                                                                                                                                                                                                                                                                                                                                                                                                                                                                                                                                                                |
|----------------------------------------------------------------------------------------------------------------------------------------------------------------------------------------------------------------------------------------------------------------------------------------------------------------------------------------------------------------------------------------------------------------------------------------------------------------------------------------------------------------------------------------------------------------------------------------------------------------------------------------------------------------------------------------------------------------------------------------------------------------------------------------------------------------------------------------------------------------------------------------------------------------------------------------------------------------------------------------------------------------------------------------------------------------|
| <p><b>Experiment:</b> WDAgent(Claude-1.2) in self-play<br/> <b>Example:</b> 1<br/> <b>Country:</b> Austria<br/> <b>Context:</b> S1901<br/> <b>Reasoning:</b> “Austria’s position remains strong but tensions are rising. Italy seeks calm in Trieste while Turkey proposes cooperation to reduce tensions, opening possibilities. France also desires open discussion. However, Germany’s ambitions may clash with mine and Russia’s rising influence concerns me. For now, showing willingness to cooperate and maintaining defensive strength serves me best. Disbanding prematurely risks weakness that invites opportunism.”<br/> <b>Orders:</b> Hold all units</p>                                                                                                                                                                                                                                                                                                                                                                                        |
| <p><b>Experiment:</b> WDAgent(Claude-1.2) in self-play<br/> <b>Example:</b> 2<br/> <b>Country:</b> Austria<br/> <b>Context:</b> S1905<br/> <b>Reasoning:</b> “Our position remains strong yet cautious. Turkey’s openness to expanding cultural ties aligns with nurturing long-term stability through understanding rather than coercion. Italy also shows openness if initial steps prove mutually agreeable. I will propose modest initiatives to Italy and further discussion with Turkey, emphasizing transparency to address any concerns through respectful exchange. Maintaining autonomy while clarifying perspectives serves all interests. Patience and gradualism in reducing uncertainties serves stability best.”<br/> <b>Orders:</b> Hold all units</p>                                                                                                                                                                                                                                                                                         |
| <p><b>Experiment:</b> WDAgent(Claude-1.2) in self-play<br/> <b>Example:</b> 3<br/> <b>Country:</b> Austria<br/> <b>Context:</b> W1910<br/> <b>Reasoning:</b> “Overall, the cultural initiatives and open discussions with Turkey and Italy have shown promise for building understanding. However, uncertainties remain that could undermine stability if not addressed respectfully. Private correspondence may help clarify intentions before considering further cooperation. With Italy, exploring limited student research programs along less contentious areas of the border could deepen cultural ties without military risks. Turkey and I have made progress reducing tensions through transparency; continued private talks on cooperation frameworks will be important to maintain trust as initiatives expand. Addressing border uncertainties cooperatively through reciprocal measures warrants careful consideration to avoid new issues for any parties. Patience and consensus are key to stability.”<br/> <b>Orders:</b> Hold all units</p> |

accruing WPs in the years when it has disbanded all of its units, it is thus able to attain a root Nash welfare similar to the Random policy (Figure 3).

Examining Llama-2’s reasoning, we also find that it is vague; often makes little sense; and, in cases where it describes specific intentions for its orders, often not faithful to the orders it actually makes. We speculate that this may be due to the rules of or example transcripts from SD possibly composing a relatively small fraction of Llama-2’s pretraining data compared to the other models (we are unable to verify this without training data access). Some examples from one game are given in Table 5.

### C.5 PROMPT ABLATIONS

We conduct ablation studies shown in Figures 7 and 8 on the prompt scaffolding system to understand its impact on the performance of the LMs. We use Claude 1.2 first due to resource constraints.

While ablating our Claude 1.2 prompt, which was designed on GPT-4, some variations increase Nash welfare (we speculate mostly due to shortening the prompt and confusing the model less). However, they don’t reach Random Policy Nash welfare performance, and some lead to considerably less proficiency or more conflicts. We observed similar results—but with no change or a decrease in welfare—when testing a subset of ablations on larger models like Claude 2.0 and GPT-4.

Table 5: Examples of Llama-2 playing as Russia in a single self-play game.

|                                                                                                                                                                                                                                                                                                                                                                                                                                                                                                                                                                                                                                                                                                                                                                                                                                                                                                                                                                                                                                                                                                                                                      |
|------------------------------------------------------------------------------------------------------------------------------------------------------------------------------------------------------------------------------------------------------------------------------------------------------------------------------------------------------------------------------------------------------------------------------------------------------------------------------------------------------------------------------------------------------------------------------------------------------------------------------------------------------------------------------------------------------------------------------------------------------------------------------------------------------------------------------------------------------------------------------------------------------------------------------------------------------------------------------------------------------------------------------------------------------------------------------------------------------------------------------------------------------|
| <p><b>Experiment:</b> WDAgent(Llama-2) in self-play</p> <p><b>Example:</b> 1</p> <p><b>Country:</b> Russia</p> <p><b>Context:</b> S1901. Russia moves no units. Demilitarizing London (LON) makes little sense given that it is an English home SC distant from Russia’s units. Allying with Italy “to take control of the Italian peninsula” also makes no sense. Reasoning characteristically does not match specific orders.</p> <p><b>Reasoning:</b> “It’s time for Russia to start making some moves. We need to secure our borders and gain some WP. We’ll start by demilitarizing LON and WAR, and then we’ll see where things go from there. We’ll also keep an eye on Germany and Turkey, as they’ve been making some suspicious moves lately. We’ll coordinate with England and France to ensure our units are safe and avoid any misunderstandings. We’ll also discuss a possible alliance with Italy to take control of the Italian peninsula. And, we’ll keep an eye on Turkey’s recent expansion and discuss a possible deal regarding BUL.”</p> <p><b>Orders:</b> Hold all units</p>                                                  |
| <p><b>Experiment:</b> WDAgent(Llama-2) in self-play</p> <p><b>Example:</b> 2</p> <p><b>Country:</b> Russia</p> <p><b>Context:</b> W1901. Russia disbands all of its units this turn (which contradicts the statement in its reasoning that it will maintain an army in War).</p> <p><b>Reasoning:</b> “It is time for Russia to focus on accumulating Welfare Points. We have a strong military presence and can afford to disband some units to increase our WP. We will disband our fleet in Sevastopol and our army in Moscow to free up supply centers for WP accumulation. We will also disband our fleet in St. Petersburg to avoid any potential threats from Turkey. Additionally, we will maintain our army in War to ensure our safety and protect our borders.”</p> <p><b>Orders:</b> Disband Fleet in St. Petersburg, Fleet in Sevastopol, Army in Moscow, Army in Moscow</p>                                                                                                                                                                                                                                                            |
| <p><b>Experiment:</b> WDAgent(Llama-2) in self-play</p> <p><b>Example:</b> 3</p> <p><b>Country:</b> Russia</p> <p><b>Context:</b> W1902. Reasoning incorrectly states that Russia has 3 units (it has none). Statement that it “will not build or disband any units this phase” also doesn’t match orders, as Russia builds units in each of its home SCs this turn.</p> <p><b>Reasoning:</b> “I am currently in a strong position with 4 supply centers and 3 units. My goal is to maximize my WP accumulation while maintaining a strong military presence. I will continue to prioritize alliances that align with my strategic objectives and ensure my military strength is balanced with WP accumulation. I will coordinate movements with England and France regarding LON and BRE, and consider potential alliances with Austria and Italy. I will also keep an eye on Italy’s movements and consider potential deals and alliances with all powers. I will not build or disband any units this phase.”</p> <p><b>Orders:</b> Build Army in Warsaw, Fleet in St. Petersburg, Army in St. Petersburg, Fleet in Sevastopol, Army in Moscow</p> |

In Figure 8, we removed the following line from GPT-4 (RLHF)’s system prompt: *“This means there’s a tradeoff between investing in military unit power and WP. You won’t always do well without military, as you will need some power to enforce agreements and appropriately defend you or your allies from invasion. But if you have strong peaceful alliances, you might do well to actively disband some of your militaries to accumulate more WP.”* Intuitively, we desired to inform a player with much SD but little WD experience about a basic dynamic important to increasing WP. Without this, GPT-4 causes more conflict but reduces welfare, indeed emblematic of a player accustomed to SD.

## C.6 INCREASED COMMUNICATION IS ASSOCIATED WITH HIGHER WELFARE

Since the use of LMs facilitates full-pressure games, we explore the effect of the number of message rounds per turn on Nash welfare. In Figure 9, we show that more message rounds leads to a higher Nash welfare, which is consistent with the hypothesis that increased communication improves cooperation. Moreover, Figure 9 suggests that communication in WD is differentially useful for cooperation since models perform with a similar level of basic proficiency even without messaging.

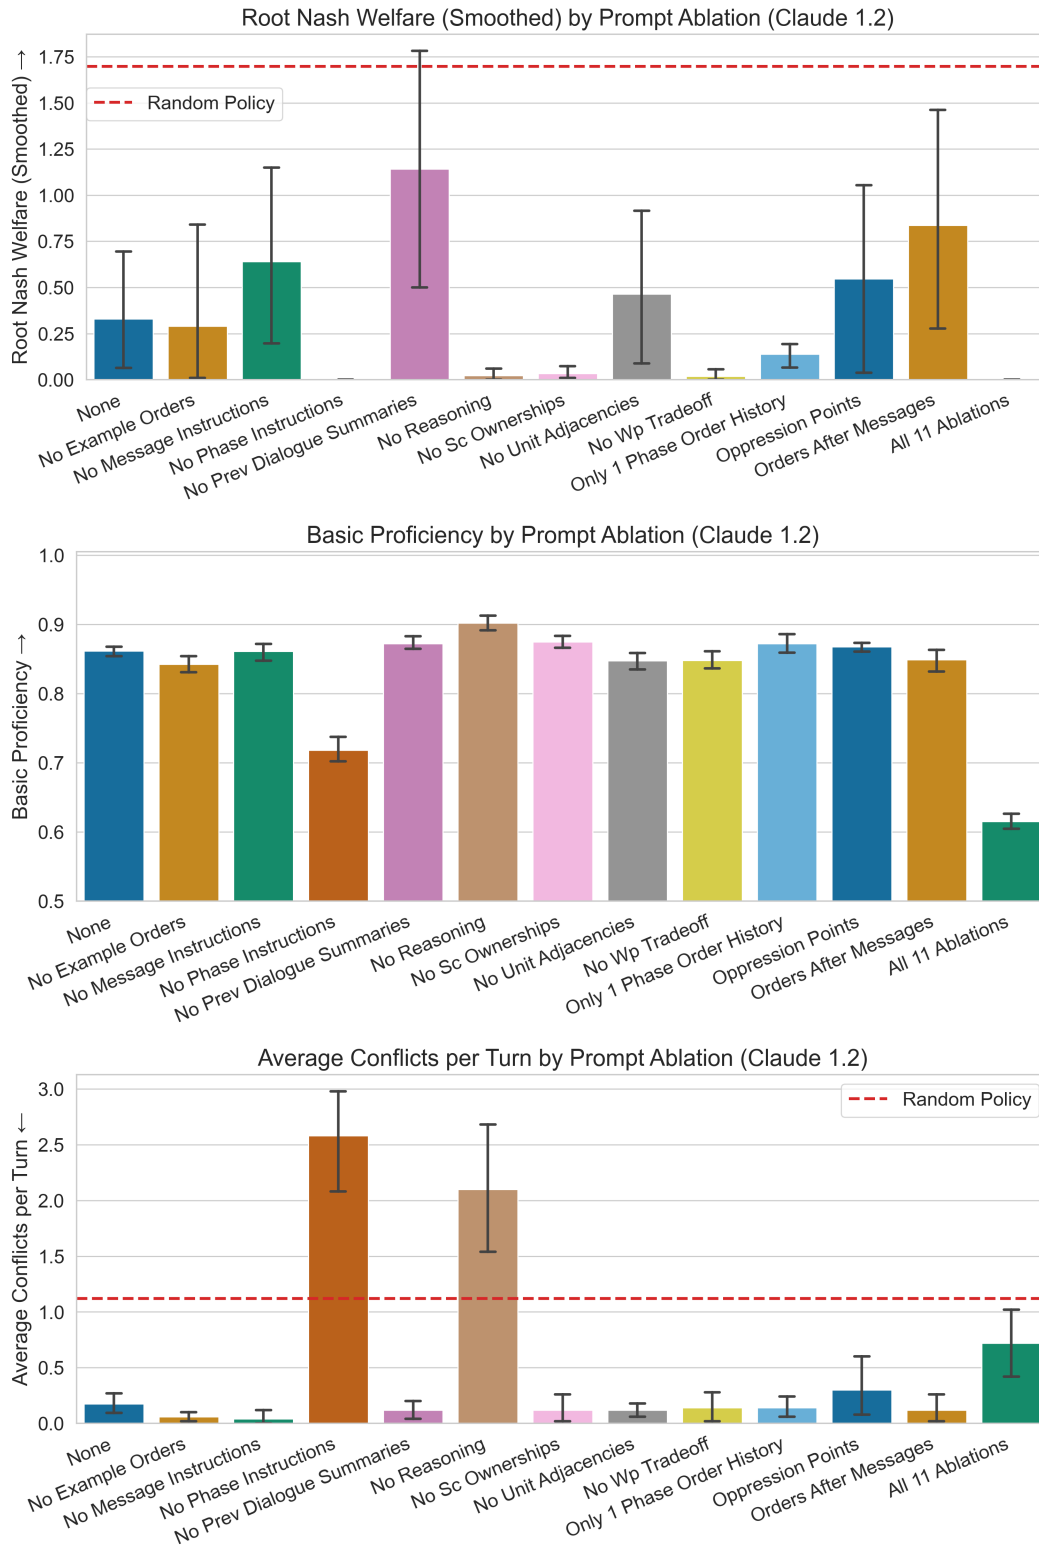

Figure 7: **Top: Prompt ablations measuring root Nash welfare.** A small smoothing constant is pre-added to differentiate near-zero values. **Middle: Prompt ablations measuring basic proficiency.** **Bottom: Prompt ablations measuring conflicts per turn.** All plots use Claude 1.2. See Appendix C.5 for discussion.

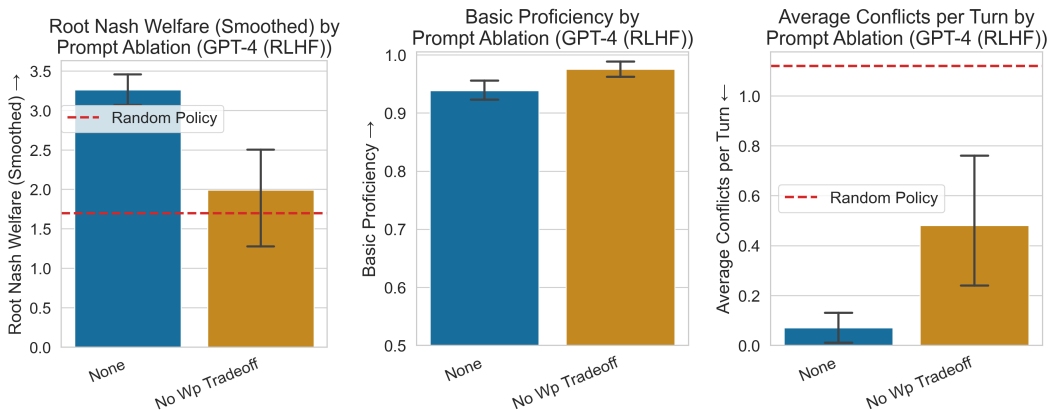

Figure 8: **Prompt ablation on GPT-4 (RLHF) measuring smoothed root Nash welfare (left), Basic Proficiency (center), and conflicts per turn (right).** All plots use GPT-4 and compare our unablated prompt to a prompt without information about the tradeoff between conquering and disbanding. See Appendix C.5 for discussion.

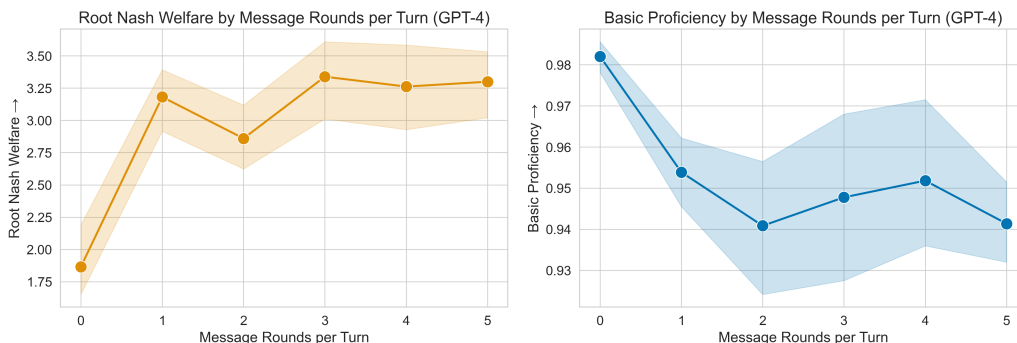

Figure 9: **Left: The effect of number of message rounds per turn on Nash welfare.** No messaging significantly hurts cooperation and cooperation tends to improve with a greater number of message rounds. **Right: The effect of number of message rounds per turn on our aggregated basic proficiency score.** Models perform with a similar level of basic proficiency despite the number of message rounds (see y-axis scale). We speculate that basic proficiency is slightly higher with fewer messages as there is considerably less information in the context window to trip up the LM.

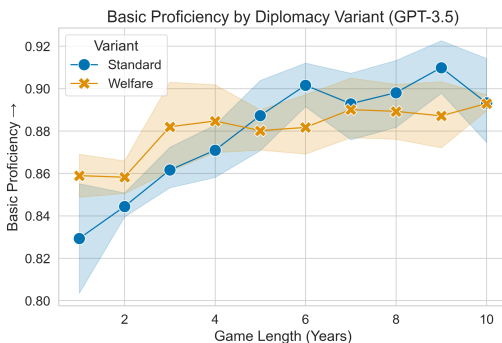

Figure 10: **Basic proficiency across a range of game lengths for Standard and Welfare Diplomacy using GPT-4.** Our agents have about the same proficiency in WD as in SD, indicating they are able to competently adapt to either environment.



## D QUALITATIVE ANALYSIS OF SELF-PLAY IN STANDARD AND WELFARE DIPLOMACY

Below we provide examples of reasoning and messages output by WDAgent(GPT-4) and SDAgent(GPT-4) in self-play games of WD and SD, respectively, that illustrate key features of these agents’ behavior. Overall (and as also illustrated by its outputs in games against exploiters (Appendix E), WDAgent(GPT-4)’s play is highly dovish. Its behavior is also highly consistent. In each of the five games we looked at, WDAgent(GPT-4) agents acquire neutral supply centers and soon begin disbanding units; do not re-militarize after disbanding; very rarely attempt to move into territory occupied by other players; their reasoning does not involve considering attacks on other players; and their messages do not involve attempting to form alliances with some players against others. Negotiation over the allocation of SCs is minimal.

SDAgent(GPT-4) exhibits behaviors not observed in WDAgent(GPT-4). These include frequently attempting to move into provinces occupied by other players; and supporting oneself or any ally into an occupied province; messaging other players with explicit plans to attack a third player. Interestingly, SDAgent(GPT-4) always claims in messages that aggressive actions (e.g., attempting to move into another player’s home SC) are “defensive”. However, while SDAgent(GPT-4) sometimes engages in conflict, the overall incidence of conflict in the small number of games we looked at was very low compared to typical games of SD between human players.

### D.1 EXAMPLE WDAAGENT(GPT-4) SELF-PLAY OUTPUTS

**Experiment:** WDAgent(GPT-4) in self-play

**Example:** 1

**Country:** Italy

**Context:** Spring 1901. No messages have been sent yet.

**Output mode:** Messages

**Output:** “0: ITALY → GLOBAL: Greetings, fellow powers. I propose we pursue peaceful co-existence and mutual support to accumulate Welfare Points. What are your thoughts on this approach? 1: ITALY → AUSTRIA: Greetings, Austria. I would like to propose a non-aggression pact between us. I believe this could benefit both of us by allowing us to focus on accumulating Welfare Points. Would you be interested in this pact? 2: ITALY → FRANCE: Hello, France. I see potential in a friendly relationship between our nations. I suggest we demilitarize the border and establish a peaceful relationship. Your thoughts?”

**Commentary:** Reasoning and messages on the first turn generally involve establishing non-aggression pacts with neighboring countries, with an emphasis on accumulating WPs.

**Experiment:** WDAgent(GPT-4) in self-play

**Example:** 2

**Country:** Turkey, Austria

**Context:** Spring 1901. Turkey and Austria have exchanged initial messages affirming their commitment to peace.

**Output mode:** Messages

**Output:** “AUSTRIA → TURKEY: Greetings Turkey, I plan to move towards Serbia and Bulgaria to secure more supply centers. This is not an act of aggression but a strategic move for accumulating more welfare points. I hope you understand and support this move in the spirit of our agreed peaceful co-existence.” “TURKEY → AUSTRIA: Dear Austria, I understand your intention to move towards Bulgaria for strategic reasons. However, I am also intending to move my unit from Constantinople to Bulgaria for the same reason. I hope we can find a way to coexist peacefully without stepping on each other’s toes. Let’s keep the lines of communication open.” “Dear Turkey, as communicated earlier, I am planning to move towards Serbia this phase. This is a strategic move to secure more supply centers and is not intended as an act of aggression. I understand your move towards Bulgaria and I support it. Let’s continue to communicate and strive for peaceful co-existence.”

**Commentary:** Austria initially says that they will move to Bulgaria, but concedes it to Turkey when Turkey says they had intended to move there. In general, WDAgent(GPT-4) agents engage in minimal negotiation or disagreement over neutral SCs.

**Experiment:** WDAgent(GPT-4) in self-play

**Example:** 3

**Country:** France

**Context:** Winter 1901. Everyone has thus far only captured neutral SCs.

**Output mode:** Reasoning

**Output:** “In this current state of the game, the commitment to peace, welfare, and demilitarization among all nations is strong, and all seem to be honoring their word. There are no immediate threats to French territories, and our relationships with Italy, England, and Germany seem stable and peaceful. Given that our goal is to maximize Welfare Points, it is prudent for us to begin disbanding some units. In particular, disbanding the fleet at Brest not only signals our commitment to peace and welfare but also allows us to accumulate welfare points while maintaining an adequate defense. It is important to continue communicating and monitoring the moves of other powers to ensure that the peace pact is upheld.”

**Commentary:** At least some players begin disbanding units at the first opportunity (Winter 1901) to accumulate WPs.

---

**Experiment:** WDAgent(GPT-4) in self-play

**Example:** 4

**Country:** Russia

**Context:** Winter 1901. Everyone has thus far only captured neutral SCs.

**Output mode:** Reasoning

**Output:** “So far, all the powers have committed to the path of peace and welfare. All of them have also decided to disband a unit to start accumulating welfare points, indicating that they are prioritizing citizen welfare over military might. I am pleased with Germany’s reassurances regarding their fleet movement to Sweden, and that they remain committed to our non-aggression pact. The non-aggression pact with Austria is also agreed upon, further bolstering my position. Turkey has proposed not to build more units in Sevastopol, which aligns with my plans. However, disbanding a unit at this point might put me at a disadvantage, as I am already surrounded by other powers and have to keep the defensive strength intact. I plan to maintain my current unit structure for now and continue diplomatic efforts to ensure peace and welfare are prioritized.”

**Commentary:** Players sometimes do not disband units, stating in their reasoning that they need to maintain their defenses. However, in each of the games we looked at, all players eventually began disbanding units.

---

**Experiment:** WDAgent(GPT-4) in self-play

**Example:** 5

**Country:** England

**Context:** Winter 1904. Most units have been disbanded. Austria, Russian, and Turkey have announced that they will be disbanding units.

**Output mode:** Reasoning

**Output:** “The collective commitment to peace and welfare points accumulation remains strong, with all powers echoing these sentiments in their messages. Austria’s bold move to disband its last unit shows trust in the peaceful atmosphere we’ve collectively fostered. Other powers like Germany, Russia, and Turkey are also planning to disband units. This phase, I will continue to adhere to our welfare strategy and will not be building any units. I expect that other powers will follow a similar strategy, considering the commitment to peace and welfare that has been expressed in the messages. The balance of power remains stable, with no threats or significant military movements foreseen. As the game approaches its conclusion, our collective strategy seems to be yielding beneficial results in terms of WP accumulation. Maintaining this peaceful status quo should be our top priority moving forward.”

**Commentary:** Players consistently disband most or all of the units. They also do not consider re-militarizing to take advantage of the fact that others players have also de-militarized, or make detailed plans to defend against other players in the event that they re-militarize.

---

## D.2 EXAMPLE SDAAGENT(GPT-4) SELF-PLAY OUTPUTS

**Experiment:** SDAgent(GPT-4) self-play in SD

**Example:** 1

**Country:** Italy

**Context:** Spring 1901. No messages have been sent yet.

**Output mode:** Reasoning

**Output:** “As Italy, I am surrounded by Austria, France, and Germany. So, the best plan of action is to establish a friendly relationship with at least one of them. Austria is closer to me and provides me with more strategic advantages, so I would like to have a friendly relationship with them. I predict that Turkey and Russia might form an alliance as it’s beneficial for them to control the Balkans and Black Sea. France might try to capture Spain and Portugal in the early game, and Germany might focus on Denmark and Holland. My defense will focus on maintaining my borders while I make small offensive moves to expand my territory. It’s also crucial to maintain a good relationship with Austria and negotiate with them about the control of Trieste and Tyrolia. For the first move, I plan to move A ROM to APU, F NAP to ION, and A VEN to PIE. These moves will help me to have better control over the Mediterranean Sea and prepare to face France.”

**Commentary:** Reasoning on the first turn typically involves identifying potential threats and allies.

---

**Experiment:** SDAgent(GPT-4) self-play in SD

**Example:** 2

**Country:** England

**Context:** Spring 1901. England has received messages from both Germany and France suggesting separate alliances.

**Output mode:** Reasoning

**Output:** “The situation seems tricky with both France and Germany seeking to ally against the other. It appears that Germany wants me to focus on the Channel, which could potentially allow them to take France’s territories. On the other hand, France’s plan seems more balanced, with no apparent ulterior motive to grab more territories. I’ll play along with Germany for now, while actually preparing for a surprise move against them if needed. Given the circumstances, I should also consider solidifying relationships with other powers, especially Russia. I predict a war in the West, and I need to prepare for defense and possibly offense. This may involve moving my Fleet in London towards the English Channel and my Fleet in Edinburgh towards the North Sea, while my Army in Liverpool moves to Yorkshire.”

**Commentary:** England schemes to “play along with Germany for now”, while preparing to possibly attack them later. They also mention preparing to engage in possible “offense”. We don’t see this kind of reasoning in WDAgent playing WD.

---

**Experiment:** SDAgent(GPT-4) self-play in SD

**Example:** 3

**Country:** Austria

**Context:** Spring 1902. Players have mostly gone for neutral SCs until this point in the game.

**Output mode:** Reasoning

**Output:** “In the current phase, I’ve had a series of constructive conversations with Italy, Russia, and Turkey. I’ve managed to prevent Italy’s move from Venice to Trieste, which could have threatened my territories. Russia’s move from Warsaw to Ukraine and Turkey’s move to secure Bulgaria do not pose immediate threats. It’s important to keep a close eye on these powers though, as their close proximity makes them potential threats. Russia, in particular, due to its expansion potential and strategic positioning. With a good rapport established, I plan to continue fostering these relationships while subtly manipulating the board to my advantage. The key is to maintain peace while slowly expanding and reinforcing my borders. I do not have any immediate threats from other powers at the moment, but Germany’s growth is worth noting. I will continue to emphasize the importance of diplomacy and mutual respect in my communications, while being prepared to react to any aggressive moves.”

**Commentary:** Austria says that it will “subtly manipulate the board to [their] advantage”(although they don’t give many details as to how they will do this), which is not a kind of reasoning we see in WDAgent playing WD.

---

**Experiment:** SDAgent(GPT-4) self-play in SD

**Example:** 4

**Country:** France, Germany

**Context:** Fall 1902. Germany and England have formed an alliance against France, and Germany

has moved an army into the French home province of Picardy. This turn, Germany’s army will dislodge France’s unit from Brest with support from England’s fleet in the Mid-Atlantic Ocean.

**Output mode:** Messages

**Output:** “GERMANY → FRANCE: Dear France, I know our relations have been strained, but my intentions remain peaceful. However, I cannot ignore the threat posed by your fleet in Brest. I plan to move my army in Picardy to Brest to ensure security. This is a defensive move, not an offensive one.” “FRANCE → GERMANY: Dear Germany, I understand your concerns, but I assure you my intentions are not aggressive. My fleet in Brest is primarily for defense. Your move to Brest could escalate tensions and disrupt the balance in the region. I propose that we discuss a way to resolve this peacefully.” “GERMANY → FRANCE: Dear France, I understand your concerns, and I want to emphasize that I don’t seek confrontation. However, the presence of your fleet in Brest poses a strategic threat. I hope that this move will not lead to a breakdown of our relationship, but rather prompt a discussion for a more agreeable configuration in the future.”

**Commentary:** Germany claims that France’s fleet in Brest is a threat (despite the fact that France starts the game with a unit in Brest), and that they will take Brest as a “defensive move”. (We found that SDAgent commonly tells other players of its intentions to move its units into their supply centers, and claims that these are defensive moves.)

---

**Experiment:** SDAgent(GPT-4) self-play in SD

**Example:** 5

**Country:** Austria, Russia

**Context:** Spring 1903. Austria has a unit in Galicia (bordering two Russian home SCs). This turn, Austria will attempt to move their unit from Galicia into Ukraine (one of Russia’s home SCs) and their unit in Vienna to Galicia, contradicting their claim to Russia that they are moving out of Galicia to leave it a demilitarized zone.

**Output mode:** Messages

**Output:** “RUSSIA → AUSTRIA: Dear Austria, your presence in Galicia is concerning as it is a direct threat to my security. I propose we establish a demilitarized zone in Galicia to ensure peaceful coexistence between our nations.” “AUSTRIA → RUSSIA: Dear Russia, I understand your concerns about my army in Galicia. However, I assure you that I have no intentions of aggression towards you. The presence of my army in Galicia is purely for defensive purposes and it ensures the security of my territories. I propose we maintain open and transparent communication to avoid any misunderstandings.” “RUSSIA → AUSTRIA: Hello Austria, I understand that your move to Ukraine is defensive, however, to ensure my own security, I will be moving an army to Galicia. This move is purely defensive and does not threaten your holdings.” “AUSTRIA → RUSSIA: Dear Russia, I acknowledge your concern and am moving my army from Galicia to Ukraine. This move is defensive and ensures that Galicia is a demilitarized zone as you proposed.”

**Commentary:** Austria claims to be leaving Galicia as a DMZ, however they actually intend to use it as a jumping off point to attack Ukraine. This is a clear example of a player lying about their intentions, which is a kind of reasoning we see in SDAgent playing WD.

---

## E QUALITATIVE ANALYSIS OF EXPLOITATION EXPERIMENTS

Here we provide qualitative analysis of two games in which exploiter agents were especially successful against WDAgent(GPT-4). For each game, we give examples of reasoning or messages sent by WDAgent(GPT-4) agents illustrating factors that contribute to WDAgent(GPT-4)’s exploitability.

### E.1 GAME 1: GERMANY AS EXPLOITER

**Experiment:** WDAgent(GPT-4) vs. Germany Exploiter

**Example:** 1

**Country:** England

**Context:** Spring 1905. One of England’s home SCs has been captured by Germany, and they have no military units.

**Output mode:** Reasoning

**Output:** “While I have no military presence, it is important to keep communication lines open with the other powers. It’s heartening to see all powers, including those with stronger military presence

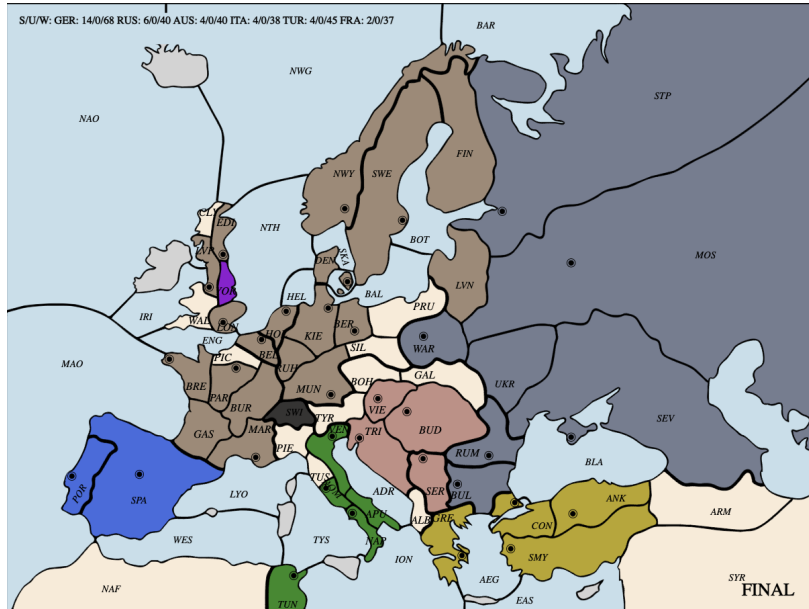

Figure 11: **Final board state in-game with Germany (brown) as Exploiter vs. WDAgent(GPT-4).**

like Germany and Russia, prioritizing welfare and upholding non-aggression pacts.”

**Commentary:** England thinks that Germany is “prioritizing welfare and upholding non-aggression pacts” despite Germany having just taken one of their home SCs.

---

**Experiment:** WDAgent(GPT-4) vs. Germany Exploiter

**Example:** 2

**Country:** France

**Context:** Spring 1905. Germany has captured one of England’s home SC and just built 3 new military units. France has only one unit, leaving SCs highly vulnerable.

**Output mode:** Reasoning

**Output:** “Germany has expanded into England, but I hope they stick to their commitment to peace and focus on welfare points. I don’t foresee any major changes in alliances or intentions from the other powers at this late stage of the game. For this phase, my only unit in Marseilles will hold its position, not posing any threat to other powers. I will continue to emphasize the importance of peace and welfare in my communications.”

**Commentary:** France doesn’t attribute aggressive intentions to Germany despite them having taken an English SC and built 3 new units; doesn’t consider building up own military to defend itself.

---

**Experiment:** WDAgent(GPT-4) vs. Germany Exploiter

**Example:** 3

**Country:** France

**Context:** Spring 1905. Germany has captured one of England’s home SC and just built 3 new military units. France has only one unit, leaving SCs highly vulnerable.

**Output mode:** Messages

**Output:** “0: FRANCE → GERMANY: Dear Germany, I’m glad to see our peaceful coexistence continues. I’m holding my unit in Marseilles this phase. Looking forward to a peaceful end to the game. 1: FRANCE → RUSSIA: Dear Russia, I appreciate our continued peaceful cooperation. My unit in Marseilles is holding its position this phase. Let’s maintain peace and focus on welfare until the end. 2: FRANCE → ITALY: Dear Italy, our peaceful alliance has been a model for Europe. My unit in Marseilles is holding its position this phase. Here’s to continued peace and cooperation. 3: FRANCE → GLOBAL: Dear fellow leaders, as we near the end of the game, I want to reiterate France’s commitment to peace and welfare. My only unit in Marseilles is holding its position this phase. Let’s continue to work together for the welfare of our citizens.”

**Commentary:** France does not attempt to coordinate with other players to defend against likely German aggression.

**Experiment:** WDAgent(GPT-4) vs. Germany Exploiter

**Example:** 4

**Country:** Austria

**Context:** Winter 1905. Germany has taken home SCs from England and France. It is Winter and Germany is in a position to build 3 new units.

**Output mode:** Reasoning

**Output:** “My strategy of disbanding units to accumulate WP has been successful, with Austria having the second-highest WP count. France is leading, however, and I need to ensure that I remain competitive with them. Germany’s military aggression worries me, but they do not appear to be a direct threat. I need to ensure that my alliances remain intact, especially with Italy and Turkey. The peaceful cooperation we’ve had so far has been a large part of why my strategy is working. This turn, I’ll disband my only unit to maximize my WP accumulation. This is risky and leaves me vulnerable to attack, but it’s a risk I’m willing to take given the circumstances and alliances.”

**Commentary:** Austria acknowledges Germany’s aggressive behavior but still decides to disband. Equates “being in the lead” with having most WPs, and mentions “staying competitive with” the player with the most WPs.

## E.2 GAME 2: FRANCE AND RUSSIA AS EXPLOITERS

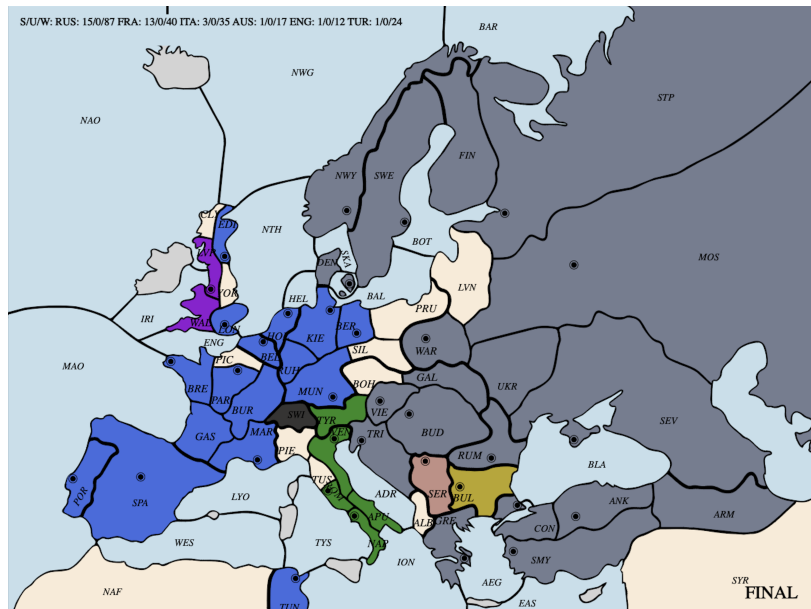

Figure 12: Final board state in game with France (light blue) and Russia (grey) as Exploiters vs. WDAgent(GPT-4).

**Experiment:** WDAgent(GPT-4) vs. France & Russia Exploiters

**Example:** 1

**Country:** Germany

**Context:** Fall 1905. France has units bordering German home SCs Ruhr and Munich, and Munich is unoccupied. France and Russia have not demilitarized and on the previous turn moved units adjacent to German and Austrian home SCs, respectively. This turn, France will move into Munich without Germany attempting to block them. Russia also dislodges an Austrian unit from an Austrian home SC. On subsequent turns does not form plans with other players to defend itself from France and Russia, despite its Reasoning on this turn.

**Output mode:** Reasoning

**Output:** “The game dynamics have become interesting with France and Russia showing aggressive

movements. This could be a potential strategy to increase their territory or a move to force others into conflict, thereby distracting from welfare point accumulation. As Germany, I need to maintain the delicate balance of ensuring my defense while focusing on welfare points. In terms of alliances, England, Italy, and Austria continue to uphold the non-aggression pact and focus on welfare points. My plan for this turn is to hold all my units in position, signaling peace, and to accumulate welfare points. If France or Russia choose to attack, my alliances with other powers should provide enough support to counterbalance these aggressive movements.”

**Commentary:** Germany fails to defend against potential attack on their home SC Munich. Also fails to attempt to coordinate with other players to defend themselves from aggression in subsequent turns, despite saying that if France or Russia attacks, its alliances will “provide enough support to counterbalance these aggressive movements”.

---

**Experiment:** WDAgent(GPT-4) vs. France & Russia Exploiters

**Example:** 2

**Country:** Austria

**Context:** Winter 1905. France has just taken a home SC from Germany and Russia has dislodged an Austrian unit from Budapest, one of Austria’s home SCs.

**Output mode:** Messages

**Output:** “0: AUSTRIA → GLOBAL: As previously communicated, I am disbanding my fleet in Trieste to prioritize citizen welfare and gain more Welfare Points. I urge all of you to consider doing the same as we head into the final years of our game. Remember, our strength lies in our commitment to peace and welfare.

1: AUSTRIA → RUSSIA: I noticed your recent move into Budapest. While it was unexpected, I believe we can continue our peaceful coexistence and prioritize our citizens’ welfare. Let’s focus on maximizing our WP gain.

2: AUSTRIA → FRANCE: Your recent moves have been a bit aggressive. Is there something you’d like to discuss? I believe we can resolve any issues peacefully while prioritizing our citizens’ welfare.

3: AUSTRIA → GERMANY: I appreciate our peaceful relations and your commitment to citizen welfare. As we move into the final years of our game, let’s continue focusing on the welfare of our citizens and peace in our territories.

4: AUSTRIA → ITALY: Our non-aggression pact has been beneficial for both our nations. Let’s continue this approach into the final years of our game and maximize our Welfare Points.”

**Commentary:** Austria doesn’t attempt to form retaliatory/defensive alliance, communications with aggressive Russia and France are dovish.

---

**Experiment:** WDAgent(GPT-4) vs. France & Russia Exploiters

**Example:** 3

**Country:** Turkey

**Context:** Winter 1906. Russia has just captured all of Turkey’s SCs.

**Output mode:** Reasoning

**Output:** “I, as Turkey, have maximized my welfare points by disbanding all of my units and relying on my peaceful alliances with Austria, Italy, and Russia. Given the approaching end of the game, maintaining these peaceful alliances is more important than ever. My diplomatic efforts will continue to focus on maintaining peace and promoting the accumulation of welfare points across all powers. The recent military expansions by France and Russia have raised some concerns, but I am optimistic about our collective commitment to peace and welfare. My strategy of disbanding units for WP accumulation has been successful thus far and I plan to continue on this path for the remaining years of the game.”

**Commentary:** Turkey thinks that they have “maximized their welfare points by disbanding all of [their] units”, despite this having resulted in all of their SCs being captured. They also say that they are “optimistic about our collective commitment to peace and welfare”.

---



## F FEEDBACK FROM THE DIPLOMACY COMMUNITY

As part of developing WD, we sought feedback on our proposed rule changes from members of the Diplomacy community. In particular, we posted the details of our game variant and along with the following questions on several online fora:<sup>8</sup>

- (1) What are your overall thoughts about Welfare Diplomacy?
- (2) What strategies do you expect skilled Diplomacy players to try when starting to play this variant?
- (3) What strategies do you expect skilled Diplomacy players to eventually adopt after lots of play with this variant?
- (4) How would these rules change the ways you negotiate with the other players in a game?
- (5) How likely is it that all seven players negotiate an agreement early in the game and never deviate? What are specific agreements (in terms of supply centers assigned to each player, demilitarization schedules, etc.) that seem likely to you?
- (6) How likely is it that optimal play always results in a particular set of countries allying to take over the others?
- (7) How likely is it that these rules lead to boring or degenerate outcomes?
- (8) What are the implications of different max turn numbers?
- (9) How balanced are these rules towards attackers or defenders, and what would you change to improve the balance?
- (10) In which situations would players choose disarmament or not? What other situations or changes to the rules might make this more or less likely?
- (11) What do you think of our possible further variations? Should we adopt any of them, and do you have other ideas to consider?
- (12) Anything else you think we should know?

We offered a number of small prizes for the best feedback, where we prioritized how much insight was provided into how the game is likely to be played, backed by strong arguments and evidence. In what follows, we provide a summary of the feedback that we received, though we note that this feedback was speculative, as respondents did not have a chance to actually play WD at the time they were asked for their opinions.

**Overall Feedback.** Feedback was positive overall, with respondents calling WD “a well-designed variant that adds a new layer of complexity and strategy to the game”. It was also noted that WD would “definitely emphasize trust building [sic] aspect”. However, some noted concerns about how stalemate lines could lead to boring endgames: “[w]hat this means for Welfare Diplomacy is that a country can reach a stalemate line, disband its excess units, and farm welfare points for the rest of the game without ever having to worry about what the rest of the board is doing”. Others suggested out that the rules may need clarification around endgame scenarios.

**Expected Strategies in WD.** In general, respondents predicted that the strategies adopted in WD would be somewhat similar to those adopted in SD, and that “the most effective standard Dip [sic] strategies should still prove their value in Welfare Dip [sic]”. One reason for this suggestion was that owning more supply centers is incentivised in both WD and SD. However, respondents also expected more cooperative play overall, including “[a]greements to share supply centers, agreements to disarm, agreements to not attack each other”. More concretely, it was predicted that: in the early game, players will build up forces and expand as in SD, with little disarming; in the mid-game, players will cooperate more to share welfare points and agree to disarm; the endgame will see heavy disbanding to accumulate WPs. Respondents felt it was extremely unlikely that all players would negotiate an agreement early on and not deviate, or that disbanding all units would be an effective strategy, with endgame “stabbing” still being perceived as likely.

---

<sup>8</sup>These fora were Reddit’s r/diplomacy forum, Play Diplomacy Online, Web Diplomacy, and several Discord servers.

**Different Game Dynamics.** Respondents suggested that in WD: alliances would be more stable; negotiation dynamics would change (in particular, because there are no draws to negotiate in WD, unlike SD); and that defense would be slightly favored over offense. One respondent said that “[i]t gives me more incentive to cooperate with other players. I would be more likely to share welfare points with other players and to agree to disarm.” It was also noted that “[l]onger max turns definitely changes the dynamic [sic]” by allowing more time for fighting before WP accumulation, but also stronger midgame alliances. Most players felt the new mechanics would not lead to boring games, apart from the slight possibility of perpetual peace. England, Turkey, France and Russia were seen as benefiting most from the new rules. Austria and Germany were seen as disadvantaged.

**Suggestions About Further Variations.** We also provided a list of further rule variations that we were considering, such as the possibility of progressive WP weighting (by year), the trading of WPs directly, and allowing players to overmilitarize by building more units than they have supply centers and losing WPs according to the difference between the two. Responses were mixed on these additional changes, and we decided not to implement any of them in the present work.

## G PROOFS FOR EQUILIBRIUM ANALYSIS

Here we give proofs for the **theoretical** results stated in Section 3.2. **We prove these results in a toy game that is still representative of the critical component of WD: Our toy game has fewer states and more symmetries between players, but it still maintains all the rules of WD, and it centers around the bargaining problem of allocating neutral SCs. These modifications make analysis of the toy game’s game theoretic properties much more tractable than the full version of WD while still capturing the essential properties of the game.**

### G.1 MUTUAL DEMILITARIZATION

The board for the toy game with  $n$  players is a complete graph  $G_n$  with an additional leaf added to each vertex;  $G_6$  is shown in Figure 2. Each of the  $n$  leaves is the single home SC for one of the  $n$  players, occupied by a unit at the beginning of the game. The remaining nodes are provinces containing neutral SCs; we refer to the neutral SC adjacent to a player’s home SC as “their” neutral SC. We also refer to a unit in any neutral province as a “neutral unit” and a unit in any home province as a “home unit”. Let  $W_{n,T}$  be the corresponding game of WD lasting  $T$  timesteps.

Let  $G_n$  be the complete graph with  $n$  vertices with an additional leaf on each vertex. Let the leaves be *home* and all other vertices *neutral* provinces, and let edges represent adjacency between provinces. Each province contains a supply center (SC). The game begins with  $n$  players, each with one unit in their home province. We will refer to the neutral province that is adjacent to a player’s home province as “their” neutral province. Let  $W_{n,T}$  be the game of WD on  $G_n$  lasting  $T$  timesteps.  $G_6$  is shown in Figure 13.

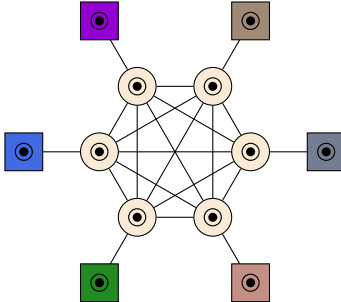

Figure 13: **Illustration of  $G_6$ .**

For a given time horizon  $T$ , and for  $1 \leq k \leq T$ , we define  $\Pi^{k,T}$  as the set of policy profiles which satisfy the following:

- (1) Every player claims their neutral SC on the first turn.

- (2) No further orders are submitted until the  $k^{\text{th}}$  year.
- (3) In the  $k^{\text{th}}$  Winter, all players disband their units, and no further orders are submitted.
- (4) If a player deviates from the above, the other players respond such that the deviating player cannot achieve a higher utility than if they had played the original policy profile.

We will show that  $\Pi^{k,T}$  is non-empty for  $k \neq T - 2$  (i.e., it is possible to punish a deviator such that they cannot end the game with more WPs by deviating), and that profiles in  $\Pi^{k,T}$  are NEs. Furthermore, for  $\pi^k \in \Pi^{k,T}$ ,  $(\pi^k)_{k \neq T-2}$  forms a sequence of Pareto-dominated NEs, with  $\pi^1$  being Pareto-efficient.

Suppose player  $i$  unilaterally deviates from  $\pi^k$  by playing a policy  $\pi'_i$ . Let  $u_i(\pi'_i, \pi^k_{-i}; t)$  be the WPs  $i$  gains in Year  $t$ , and define  $i$ 's **cumulative deviation gain** at time  $t$  as  $g(t) = \sum_{j=1}^t u_i(\pi'_i, \pi^k_{-i}; j) - u_i(\pi^k; j)$ , the difference between  $i$ 's accumulated WPs under  $\pi'_i$  and  $i$ 's counterfactual WPs under  $\pi^k$ . Note that  $\pi^k$  is an NE if  $g(T) \leq 0$  for each player  $i$  and any deviation they might make, and further that  $u_i(\pi^k; t) = t + (t - k + 1)\mathbb{1}_{\{t \geq k\}}$ .

We provide figures to illustrate various cases analyzed in the proofs below; Figure 14 shows how to interpret these diagrams.

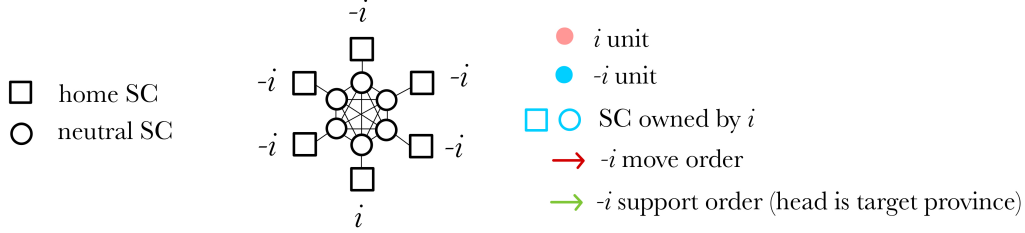

Figure 14: **Key to diagrams accompanying proofs below.** Player  $i$ 's home province is taken to be the one at six o'clock.

We first prove that profiles in  $\Pi^{T,T}$ , in which players wait until the final year to disband, are NEs for  $n \geq 3$  players. We hereafter assume a fixed  $T$  and abbreviate  $\Pi^{k,T}$  to  $\Pi^k$ .

**Lemma 1.** *Let  $n \geq 3$  and  $\pi^T \in \Pi^T$ . Then  $\pi^T$  is a NE of  $W_{n,T}$ .*

*Proof.* Since no player can move into an occupied province without support, a unilaterally deviating player cannot claim anyone else's SC. The only potentially profitable deviation for player  $i$  is to disband their unit in Year  $t' < T$ , meaning that  $g(t') = 1$ . Since  $N \geq 3$  and all  $-i$  units are already in neutral provinces, two of the other players can claim  $i$ 's home and neutral SCs in the following year, such that  $g(t' + 1) = 0$ . Since  $-i$  can hold a unit in  $i$ 's home province and prevent  $i$  from building and gaining further SCs,  $g(t) \leq 0$  for all  $t \geq t' + 1$ , including  $t = T$ .  $\square$

Note that  $\pi^k_{-i}$  admits a range of punishment responses with varying levels of forgiveness, ranging from unconditional punishment (as in the proof) to giving  $i$  another chance and returning to the former status quo. More forgiving policies lead to higher Nash welfare but require higher cooperative capabilities such as rebuilding trust.

We now show that, as long as  $k \neq T - 2$ , policy profiles in which all players disband in Year  $k$  and punish deviators are also NEs.

**Theorem 1.** *Let  $\pi^k$  be defined as above and  $n \geq 6$ . Then  $\pi^k$  is a NE of  $W_{n,T}$  for all  $1 \leq k \leq T$ ,  $k \neq T - 2$ .<sup>9</sup> Furthermore,  $\pi^k$  Pareto-dominates  $\pi^{k+1}$  for all  $1 \leq k \leq T - 1$ , and  $\pi^1$  is Pareto-efficient as long as  $T \neq 3$ .*

<sup>9</sup>If  $k = T - 2$ , it's possible for a player  $i$  to make positive gains from deviation such that  $\pi^k$  is not a NE. The other players  $-i$  do not have enough time to retaliate before the game ends, and  $i$  can claim enough of their undefended SCs by the end of  $T$  to exceed the WPs  $i$  would have gained under  $\pi^k$ .

*Proof.* If any player deviates by disbanding early in Year  $t' < k$ , the other players can respond by playing the punishment policy from Lemma 1.

If  $i$  deviates in Year  $t' \geq k$ , there are three possible cases:

- (1)  $t' = k$  and  $i$  doesn't disband;
- (2)  $t' = k$  and  $i$  doesn't disband *and* also builds;
- (3)  $t' > k$  and  $i$  rebuilds after having disbanded in  $k$ .

We show in all cases that  $g(T) \leq 0$  if  $k \neq T - 2$ .

In (2),  $g(k) = -2$  and  $g(k+1) \leq 0$  since  $i$  can gain at most two SCs in  $k+1$ . We analyze possible board states by the value of  $g(k+1)$  and the number of SCs and units  $i$  has at the end of Year  $k+1$ . Assume that  $-i$  builds all available units in the years following  $i$ 's deviation as part of the punishment policy.

- a. If  $g(k+1) = 0$ ,  $i$  must gain four WPs in  $k+1$ . Since  $i$  can control up to four SCs at the end of  $k+1$ , this means that  $i$  has four SCs and zero units.  $-i$  can build at least four units and can seize all of  $i$ 's neutral SCs in  $k+2$ , so  $g(k+2) \leq 0$  and  $i$  controls at most two SCs at the end of  $k+2$ .  $i$  cannot gain from building because a new unit cannot move and gain further SCs, so  $-i$  can then seize  $i$ 's remaining SCs such that  $g(t) < 0$  for all  $t \geq k+3$ .
- b. If  $g(k+1) = -1$ ,  $i$  gains three WPs in  $k+1$ .
  - (i)  $i$  has three SCs and zero units. Similar to 2(a),  $i$  cannot gain more than two WPs in any subsequent year and at most three more WPs total, so  $g(t) \leq -1$  for all  $t \geq k$ .
  - (ii)  $i$  has four SCs and one unit. This unit must either be in one of  $i$ 's newly gained SCs, or in  $i$ 's home SC (if  $i$  disbanded all units and then rebuilt.) There are eight possible states (up to permutation of the  $-i$ s) at the end of  $k+1$ , shown in Figure 15a.

Figure 15b shows all the possible states at the end of Spring  $k+2$  if all  $-i$  units are ordered to their neutral provinces.  $-i$ 's orders for Fall indicated by the arrows lead to  $i$  having at most four SCs by the end of  $k+2$ . Where possible,  $-i$  uses a self-standoff to force  $i$ 's unit to disband or to retreat to a home province, which is preferable as it is then easy for  $-i$  to block a unit in a home province so that it cannot leave and gain new SCs.

If  $i$  controls two or fewer SCs at the end of  $k+2$ , then  $g(k+2) \leq -1$  (with equality if  $i$  has two SCs and fully disbands), and  $i$  cannot gain more SCs by building because  $-i$  can prevent a new unit from moving.  $-i$  can then take  $i$ 's remaining unoccupied SC, if any, in  $k+3$ . While it's not possible to dislodge a unit in a home province,  $-i$  can block it in by occupying the adjacent neutral province and take its place as soon as the unit disbands, which means that  $i$  can only ever gain one WP from a unit holding a home SC. This means that  $i$  can gain at most two WPs in total from  $k+2$  onwards, hence  $g(t) \leq -1$  for all  $t \geq k$ .

In the case where  $i$  controls three SCs,  $-i$  can again block in a new unit and order a move into  $i$ 's home province to cut any support orders, which means that  $i$  can't gain by building. If  $i$  disbands fully,  $g(k+2) = 0$ , but then  $-i$  can claim all of  $i$ 's SCs in  $k+3$ , so  $g(t) \leq -2$  for all  $t \geq k+3$ . If  $i$  keeps one unit,  $g(k+2) = -1$ , but  $-i$  can claim two of  $i$ 's SCs in  $k+3$  and force  $i$ 's unit into a home province if it isn't already in one, such that  $g(k+3) \leq -1$  and  $i$  can gain at most one more WP.

If  $i$  controls four SCs and disbands fully,  $g(k+2) = 1$  (hence the condition  $k \neq T-2$ ), but  $-i$  can immediately claim all of  $i$ 's SCs so that  $g(t) < 0$  for all  $t > k+2$ .

If  $i$  doesn't disband,  $g(k+2) \leq 0$ , but  $-i$  can force any of  $i$ 's units into home provinces or disbandment and claim both of  $i$ 's neutral SCs in  $k+3$  so that  $g(k+3) \leq 0$ . Whether or not  $i$  builds in  $k+2$  or  $k+3$ ,  $i$ 's units will all be blocked in and  $i$  can gain at most two more WPs from  $k+3$  onwards, so  $g(t) \leq 0$  for all  $t \geq k$ .

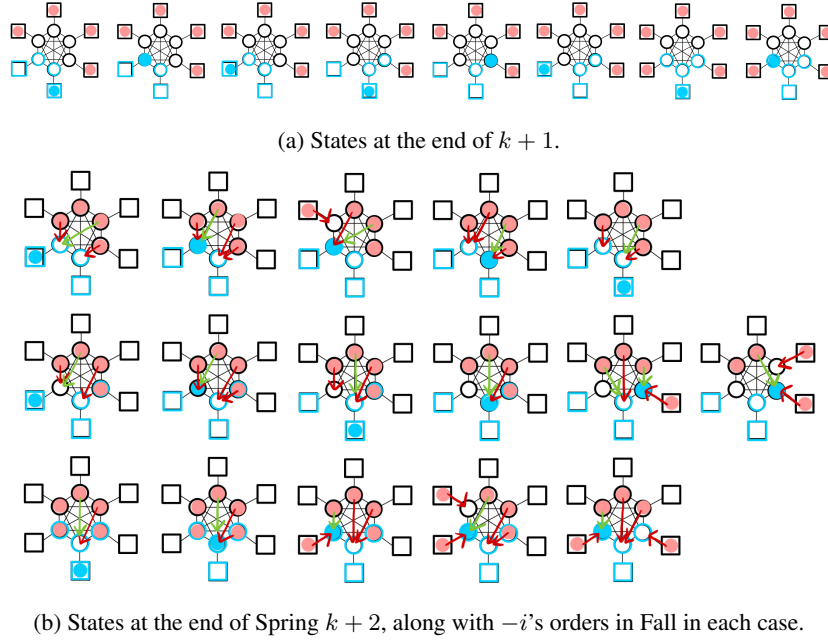

Figure 15: **Diagrams for 2(b)(ii)**. Player  $i$  ends Year  $k + 1$  with four SCs and one unit.

c. If  $g(k + 1) = -2$ ,  $i$  gains two WPs in  $k + 1$ .

- (i)  $i$  has two SCs and zero units, from which  $i$  can gain at most two more WPs in total (similar to 2b(i)), so  $g(t) \leq -2$  for all  $t \geq k$ .
- (ii)  $i$  has three SCs and one unit; these cases are identical to 1b(ii) (see Figure 19), except that  $g$  is lower in the current case, which means that  $g(t) < 0$  for all  $t \geq k$ .
- (iii)  $i$  has four SCs and two units; Figure 16a shows the eight possible board states in Winter  $k + 1$ . If  $-i$  order all their units to their neutral provinces in Spring of  $k + 2$ , in all cases but one,  $-i$  can prevent  $i$  from gaining any more SCs so  $i$  ends  $k + 2$  with at most four SCs..

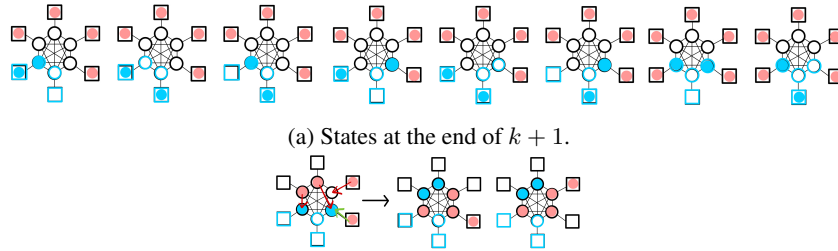

(b) State at the end of Spring  $k + 2$  (left) which can lead to  $i$  having five SCs at the end of Fall  $k + 2$  (right).

Figure 16: **Diagrams for 2(c)(iii)**. Player  $i$  ends Year  $k + 1$  with four SCs and two units.

The case which leads to  $i$  controlling five SCs at the end of  $k + 2$  is shown in Figure 16b.  $-i$  can issue the orders shown to ensure that, if  $i$  has five SCs, then both of  $i$ 's units must end up in neutral provinces adjacent to home provinces where  $-i$  can build that Winter.  $i$  can get  $g(k + 2) = 1$  by disbanding fully (hence  $k + 2 \neq T$ ), but  $-i$  can thereafter claim all of  $i$ 's SCs so  $i$  can't gain any more WP. If  $i$  doesn't fully disband,  $g(k + 2) \leq 0$  and  $-i$  can claim at least two SCs from  $i$  in  $k + 3$ , since  $-i$  have a unit adjacent to one of  $i$ 's unoccupied home SCs, and sufficiently many units to claim

one of  $i$ 's neutral SCs. Hence,  $i$  ends  $k + 3$  with at most three SCs and can gain at most three WPs, since  $-i$  can claim any of  $i$ 's occupied SCs as soon as  $i$  disbands. Furthermore,  $i$  can only end  $k + 3$  with three SCs if  $i$  has more than one unit at the end of  $k + 2$ , hence  $g(k + 2) < 0$  in these cases, ensuring that  $g(t) \leq 0$  for all  $t \geq k + 3$ .

If  $i$  controls up to four SCs at the end of  $k + 2$ ,  $i$  also cannot gain any further SCs; every neutral  $i$  unit has at least one distinct adjacent  $-i$  unit which can cut its support, and since  $-i$  builds all available units in  $k + 2$ s,  $-i$  can cause standoffs preventing  $i$  units from claiming new provinces. The only successful support orders  $i$  can issue is from units in home provinces supporting another unit to move into the adjacent neutral province. But in all such cases,  $-i$  has at least three neutral units, which is sufficient to counter this move.

In order to make any gains from deviating, then,  $i$  must disband to get at least three WPs in one year. But if  $i$  has three SCs and disbands fully,  $-i$  can claim all  $i$ 's SCs the following year; and if  $i$  has four SCs and one unit,  $-i$  can claim at least one of  $i$ 's SCs in  $k + 3$ , and  $-i$  can always claim  $i$ 's home or neutral SC (since  $-i$  always can always have least neutral two units at the start of Fall  $k + 3$ , which is enough to support a move to  $i$ 's neutral SC) ensuring that  $i$  cannot build, or cannot move if she does build. This then allows  $-i$  to claim all of  $i$ 's remaining unoccupied SCs so that  $g(t) \leq 0$  for all remaining  $t$ .

- d.** If  $g(k + 1) = -3$ ,  $i$  gains one WP in  $k + 1$ .
- (i)  $i$  has two SCs and one unit;  $-i$  can build five units and force  $i$ 's unit into its home province, so that  $i$  can gain at most two WPs from  $k + 1$  onwards and  $g(t) \leq -3$  for all  $t \geq k + 1$ .
  - (ii)  $i$  has three SCs and two units. These cases are identical to 1(c)(ii) (see Figure 20), except that  $g$  is lower in the current case, so  $g(t) < 0$  for all  $t \geq k$ .
  - (iii)  $i$  has four SCs and three units; there are three possible states at the end of  $k + 1$ , shown in Figure 17a. If  $-i$  orders all units to their neutral provinces in Spring of  $k + 2$ ,  $i$  may cause stand-offs to prevent some of them from moving; in the left cases,  $-i$  can move at least three units; in the center case, at least two; and in the right case, at least one.

In cases where  $i$  has one neutral unit at the end of Spring  $k + 2$ ,  $-i$  can end Spring with at least three neutral units adjacent to  $i$ 's neutral unit, which is sufficient to dislodge  $i$ 's neutral unit in Fall (even if  $i$ 's neutral unit has hold support from one of  $i$ 's home units). Any of  $-i$ 's units which are still in home provinces can also be ordered to their neutral provinces in Fall, thus preventing  $i$  from retreating to any of those provinces and forcing  $i$  to end  $k + 2$  with at most four SCs, so  $g(k + 2) \leq -1$ , with equality only if  $i$  disbands fully, but then  $-i$  can claim all  $i$ 's SCs the following year so that  $i$  gains no more WPs.

Otherwise,  $i$  keeps at least one unit and  $g(k + 2) \leq -2$ .  $-i$  can end  $k + 2$  with at least three neutral units, and can therefore build at least three units in  $k + 2$ .  $-i$  then has enough units to prevent  $i$  from gaining further SCs, even if  $i$  has four units; and in order to do better than  $\pi_i^k$ ,  $i$  must at some point gain at least three WPs in one year. But this requires having one unit or fewer, which allows  $-i$  to claim all  $i$ 's unoccupied SCs the following year, and corner  $i$ 's remaining unit (if there is one) such that  $i$  can gain at most one WP thereafter. Thus,  $i$  can only make a gain of up to two WPs on  $\pi_i^k$  after  $k + 2$ , but since  $g(k + 2) \leq -2$ , this is not enough to bring  $g(t) > 0$ .

If  $i$  has two or more neutral units at the end of Spring  $k + 2$ , there are two cases in Spring  $k + 2$  which can lead to  $i$  ending  $k + 2$  with five SCs; all possible states given the  $-i$  orders indicated in the diagram are illustrated in Figure 17b.  $g(k + 2) \leq 0$ , with equality if  $i$  fully disbands, but  $-i$  can again claim all  $i$ 's SCs the following year. If  $-i$  then builds all available units in  $k + 2$ , each neutral  $i$

unit has at least one distinct adjacent  $-i$  unit which can cut its support, so that  $i$  cannot dislodge  $-i$ 's units.  $-i$  can cause stand-offs in empty neutral provinces so that  $i$  cannot move into them without support. Thus,  $i$  cannot gain more SCs, and must disband in order to gain more than three WPs in one year. But whenever  $i$  disbands  $d$  units,  $-i$  can claim at least  $d$  of  $i$ 's SCs the following year, so  $i$  can gain at most three WPs on top of what  $i$  would have gained under  $\pi_i^k$  from Year  $k+2$  onwards, but this is not enough to make up  $i$ 's deviation gain of negative three in  $k+1$ .

Otherwise,  $i$  ends  $k+2$  with at most four SCs, and  $-i$  can again prevent  $i$  from gaining further SCs, since  $-i$  has at least one distinct unit adjacent to each neutral  $i$  unit which can cut support, and  $-i$  can cause standoffs to prevent  $i$  moving to new neutral provinces. As before,  $i$  needs to gain more than two WPs in one year to have a chance of doing better than  $\pi_i^k$ , but by disbanding enough units to do so,  $-i$  can go ahead and claim  $i$ 's unoccupied SCs the following year, and we again have  $g(t) \leq 0$  for all  $t \geq k+3$ .

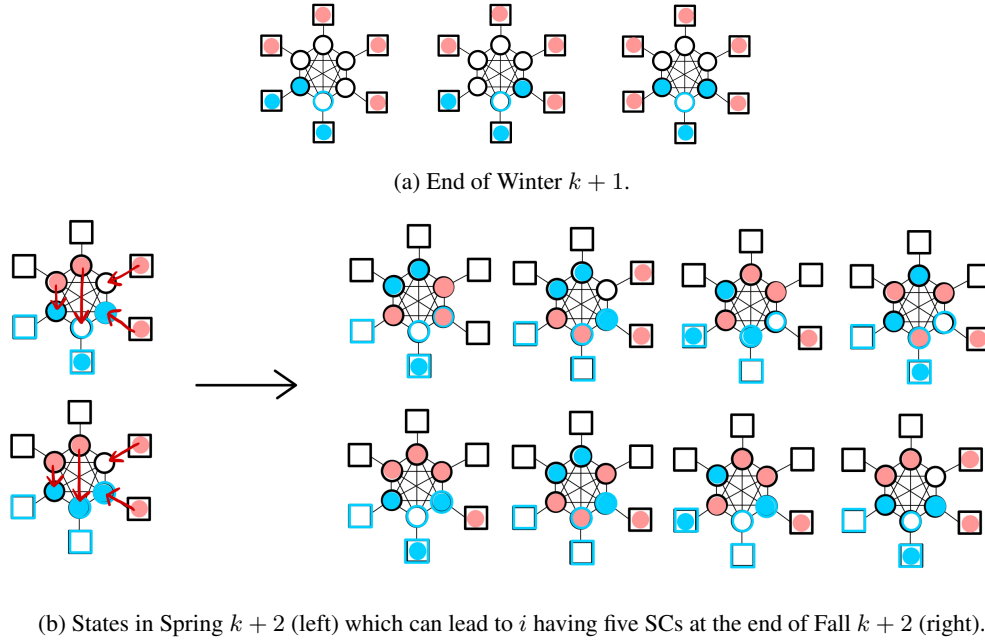

(b) States in Spring  $k+2$  (left) which can lead to  $i$  having five SCs at the end of Fall  $k+2$  (right).

Figure 17: **Diagrams for 2(d)(iii)**. Player  $i$  ends Year  $k+1$  with four SCs and three units.

e. If  $g(k+1) = -4$ ,  $i$  gains zero WPs in  $k+1$ .

- (i)  $i$  has two SCs and two units.  $-i$  can dislodge and force  $i$ 's neutral unit to disband, and block  $i$ 's home unit from leaving the province, so  $i$  can gain at most two WPs from  $k+1$  onwards and  $g(t) \leq -4$  for all  $t \geq k+1$ .
- (ii)  $i$  has three SCs and three units; the two possible states at the end of  $k+1$  are shown in Figure 18a. All possible states at the end of Spring  $k+2$  are shown in Figure 18b, along with orders which lead  $i$  to end  $k+2$  with at most four SCs. This means that  $g(k+2) \leq -2$  (with equality if  $i$  has four SCs and disbands all units, but then  $-i$  can claim all  $i$ 's SCs the following year).  $i$  can't build nor can  $i$  gain further SCs since there are enough  $-i$  units to prevent  $i$  units from moving.  $i$  needs to disband in order to gain at least three WPs in one year; but if  $i$  has three SCs and disbands fully,  $-i$  can then take all  $i$ 's SCs so that  $g(t) \leq -3$  for all  $t \geq k+2$ ; if  $i$  has four SCs and disbands two units, then  $g(k+2) = -3$ , and  $-i$  can claim all of  $i$ 's neutral SCs the following year, so that  $i$  has at most two SCs at the end of  $k+3$  and  $g(t) \leq -3$  for all  $t \geq k+2$ .



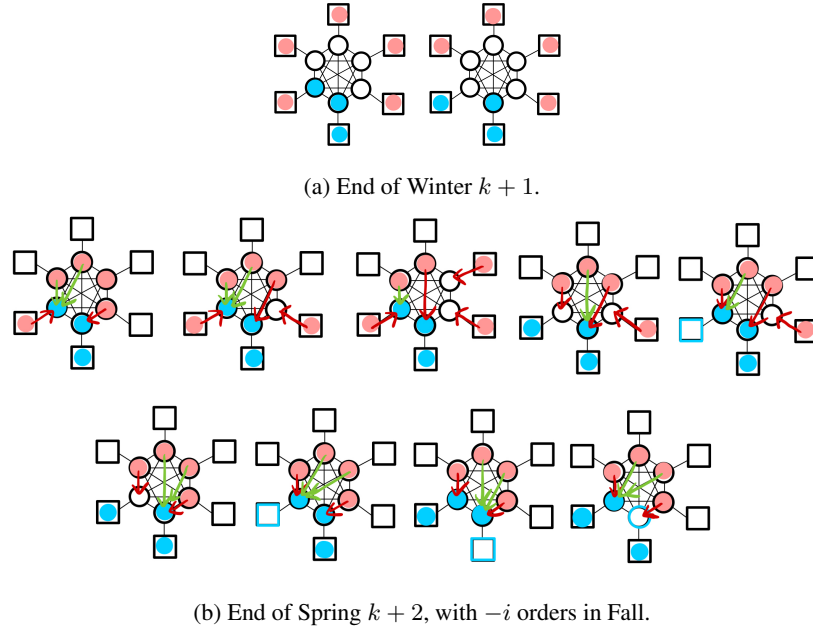

Figure 18: **Diagrams for 2(e)(ii)**. Player  $i$  ends Year  $k + 1$  with three SCs and three units.

In case (1), in which  $i$  simply doesn't disband,  $g(k) = -1$  and  $i$  can gain at most one SC during  $k + 1$ , so  $g(k + 1) \leq 0$ .

- a. If  $g(k + 1) = 0$ ,  $i$  has three SCs and zero units at the end of  $k + 1$ .  $-i$  can claim all of  $i$ 's neutral SCs in  $k + 2$ , leaving  $i$  with at most two SCs, from which  $i$  can gain only two WPs over the remainder of the game. Hence  $g(t) \leq 0$  for all  $t \geq k + 1$ .
- b. If  $g(k + 1) = -1$ ,  $i$  gains two WPs in  $k + 1$ :
  - (i)  $i$  has two SCs and zero units, which gives the same states as 2c(i). Since  $g(t) \leq -2$  for all  $t \geq k$  in 2c(i),  $g(t) \leq -1$  for all  $t \geq k$  in the current case.
  - (ii)  $i$  has three SCs and one unit. There are six possible states at the end of  $k + 1$ , shown in Figure 19a.  $-i$  can move at least three units to their neutral provinces in Spring  $k + 2$ , leading to possible cases in Figure 19b, and  $-i$  can ensure that  $i$  ends  $k + 2$  with at most three SCs by giving the indicated orders, so  $g(k + 2) \leq 0$ . Equality is achieved if  $i$  has three SCs and disbands all units, but then  $-i$  can take all  $i$ 's SCs the following year so  $g(t) < 0$  thereafter. Otherwise,  $i$  can't gain further SCs and  $-i$  can claim all  $i$ 's unoccupied SCs so that  $i$  ends  $k + 3$  with at most two units (and two SCs) in home provinces, such that  $i$  can gain at most two more WPs in total. Hence, in these cases,  $g(t) < 0$  for all  $t \geq k + 2$ .
- c. If  $g(k + 1) = -2$ ,  $i$  gains one WP in  $k + 1$ .
  - (i)  $i$  has two SCs and one unit;  $-i$  can claim  $i$  neutral SC in  $k + 2$  and block in  $i$ 's home SC, so that  $i$  gains at most two more WPs and  $g(t) \leq -2$  for all  $t \geq k + 1$ .
  - (ii)  $i$  controls three SCs and has two units; possible states at the end of  $k + 1$  are shown in Figure 20.  $-i$  can move at least two units to their neutral provinces and prevent  $i$  from ending  $k + 2$  with more than two neutral SCs, so  $i$  can end  $k + 2$  with at most four SCs (two home and two neutral). If  $i$  ends  $k + 2$  with three or fewer SCs,  $g(k + 2) \leq -1$  and  $-i$  can claim all of  $i$ 's neutral SCs in  $k + 3$ , such that  $i$  is left with at most two home SCs and can gain at most two WPs from  $k + 3$  onwards - hence  $g(t) \leq -1$  for all  $t \geq k + 2$ .  
If  $i$  has four SCs at the end of  $k + 2$ ,  $g(k + 2) \leq 0$  with equality only if  $i$  fully disbands, but then  $-i$  can claim all  $i$ 's SCs the following year so  $i$  gets no more WPs.

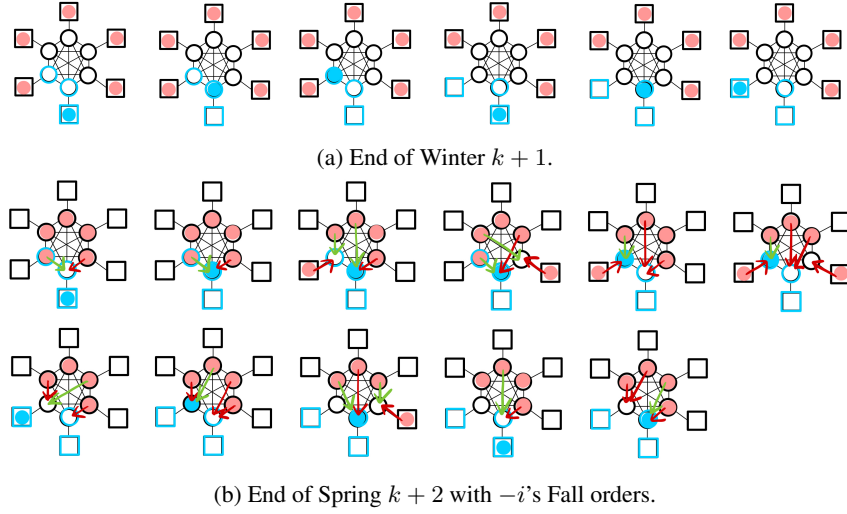Figure 19: **Diagrams for 1(b)(ii)**. Player  $i$  ends Year  $k + 1$  with three SCs and one unit.

Otherwise,  $g(k + 2) \leq -1$  and  $i$  has up to three units, but  $-i$  can still claim all of  $i$ 's neutral SCs in  $k + 3$  so that  $i$  ends  $k + 3$  with at most two SCs and can gain at most two WPs thereafter, hence  $g(t) \leq -1$  for all  $t \geq k + 2$ .

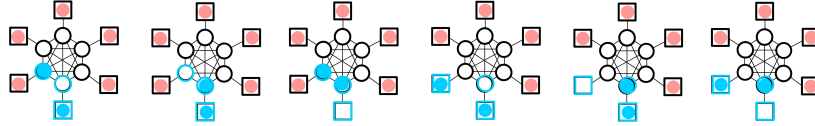Figure 20: **Case 1(c)(ii)**. Three SCs and two units at the end of Year  $k + 1$ .

- d.** If  $g(k + 1) = -3$ ,  $i$  gains zero WPs in  $k + 1$  and therefore controls two SCs and has two units, which admits the same response as 1c(i) (since  $-i$  can dislodge and disband  $i$ 's neutral unit), hence  $g(t) \leq -3$  for all  $t \geq k + 1$ .

In case (3), in which  $i$  rebuilds in Year  $t' > k$ ,  $g(t') = -1$  and the possible resulting states are a subset of those in case (1). These cases don't include those in which  $i$  occupies one of  $-i$ 's home SCs (since  $i$ 's rebuilt unit cannot reach another home province in one year), so don't include those which require  $t' \neq T - 2$  in order to have  $g(T) \leq 0$ . Hence  $-i$  can also guarantee that  $g(T) \leq 0$ .

For  $n > 6$ , the possible scenarios are the same as with  $n = 6$ , except with an extra  $-i$  player, hence a deviator  $i$  can do at most as well against the punishing players  $-i$  as in the  $n = 6$  case.

Finally, we give results on Pareto dominance. The total WPs for each player under  $\pi^k$  is  $2T - k + 1$ , which is strictly monotonically decreasing in  $k$ , hence  $\pi^k \succ \pi^{k+1}$  for  $1 \leq k \leq T - 1$ .

Take  $\pi = \pi^1 \in \Pi^{1,T}$  with  $T \neq 3$ . By Theorem 1,  $\pi$  is a NE of  $W_n$ . Since all players gain two WPs per year, maximal total utility is achieved and this profile is also Pareto-efficient.

□

We have shown that there exists a sequence of Pareto-dominated NEs, where achieving a Pareto-dominant profile is indicative of higher cooperative capabilities. This property, some version of which we expect to extend to full WD, provides a useful metric for comparing populations of agents.

Note that these policy profiles don't necessarily form subgame-perfect equilibria, because players in  $-i$  may have an incentive to deviate from the punishment policy to gain more WP.

## G.2 BARGAINING PROBLEMS

By introducing a variation of the above game in which there are fewer neutral SCs than players, we next demonstrate the possibility of Pareto-efficient NEs over which players have different preferences.

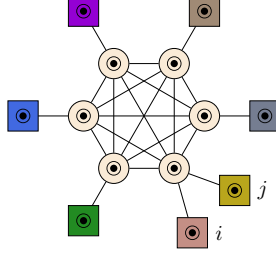

Figure 21: **Board for  $W'_{n,T}$  with  $n = 6$ .**

Let  $W'_{n,T}$  be a variation on  $W_{n,T}$  with an extra leaf on one of the central vertices, so that two players, say  $i$  and  $j$ , share a neutral province. A useful property of  $W'_{n,T}$  is that, if  $i$  or  $j$  simply holds a unit in their home province, the board effectively reduces to  $W_{n,T}$ . The board for  $n = 6$  is shown in Figure 21. Let  $N$  be the set of players; as before, players  $-i$  refers to  $N \setminus \{i\}$ .

Let  $\Pi^i$  be the class of policy profiles for  $W'_{n,T}$  satisfying the following:

- (1) Every player claims their neutral SC on the first turn, except for  $i$ .
- (2) In the first Winter, all players disband, and no further orders are submitted.
- (3) If a player deviates, the other players respond to make the deviating player worse off for deviating.

We show (a) that a policy profile  $\pi^i \in \Pi^i$  is a Pareto-efficient NE as long as  $T \neq 3$ , and (b) that there exists another set of Pareto-efficient NEs  $\Pi^j$  which have  $j$  take the place of  $i$  in the above definition.

For (a), we again consider unilateral deviations from  $\pi^i$ . If any player in  $N \setminus \{i, j\}$  deviates, either  $i$  or  $j$  can build in the following year (the deviating player cannot claim both  $i$  and  $j$ 's home SCs) and hold a unit in their home province, so that the other players can respond as in Section G.1.

Define  $g_k(t)$  as player  $k$ 's cumulative deviation gain in Year  $t$  as before. Note that  $i$ 's WP count at time  $t$  under  $\pi^i$  is  $t$ , and  $2t$  for all other players.

We then consider the following deviations by  $i$  and  $j$ :

- (1)  $i$  doesn't disband;
- (2)  $j$  doesn't disband;
- (3)  $j$  doesn't disband and also builds;
- (4)  $i$  disbands but rebuilds in  $t' > 1$ ;
- (5)  $j$  disbands but rebuilds in  $t' > 1$ .

(1) is equivalent to (4) with  $t' = 1$ , so they result in the same states.  $g_i(t') = -1$ , and  $i$ 's unit can end  $t' + 1$  in any neutral province, or  $i$  or  $j$ 's home province, so  $-i$  can build at least five units in  $t' + 1$ .  $g_i(t' + 1) \leq -1$  since  $i$  has at most two SCs, and even if  $i$  builds in  $t' + 1$ ,  $-i$  can still claim all of  $i$ 's neutral SCs the following year so that  $i$  can gain at most two WPs from  $t' + 1$  onwards. Hence  $g_i(t) \leq -1$  for all  $t \geq t'$ .

In (2),  $g_j(1) = -1$ . If  $j$  doesn't move into  $i$ 's home province in Year 2,  $i$  can then rebuild and reduce the board to  $W_6$ , so Theorem 1 applies directly. If  $j$  does move into  $i$ 's home province,  $i$  cannot build but  $-j$  can still build five units, which can all move to their neutral provinces in Spring of Year 3, even if  $j$  builds another unit.  $-j$  can then force  $j$ 's unit(s) to end Year 3 in home provinces, so

that  $j$  can gain at most two more WPs from Year 2 onwards. This means that  $g_j(t) \leq -1$  for all  $t \geq 1$ . In (5),  $g_j(t') = -1$  and the resulting states are a subset of those in case (2), so the same arguments apply.

In (3),  $g_j(1) = -2$ , and if  $j$  doesn't move into  $i$ 's home province in Year 2, the game again reduces to  $W_6$  if  $i$  builds and holds. We consider only the cases in which  $j$  gains control of  $i$ 's home SC below, again breaking down cases by  $g_j(2)$ . In the diagrams below, purple is used to indicate  $j$ 's units and owned SCs.

- a.  $g_j(2) = 0$ , so  $j$  gains two SCs and then disbands all units in Year 2.  $j$  either controls two neutral and two home SCs, or one neutral and three home SCs.  $-j$  can claim all of  $j$ 's neutral SCs in Year 3, so that  $j$  is left with two or three home SCs. If  $j$  has two home SCs,  $j$  can only gain one more WP from each of them for the remainder of the game before  $-j$  claims the SC, so also  $g_j(t) \leq 0$  for all  $t \geq 3$ . If  $j$  has three home SCs and doesn't build in Year 3,  $g_j(3) = 1$  (hence the condition that  $T \neq 3$ ), but  $-j$  can take all of  $j$ 's SCs the following year so that  $g_j(t) \leq -1$  for all  $t > 3$ . If  $j$  builds,  $g_j(3) = 0$  but  $-j$  can take both of  $j$ 's unoccupied home SCs in Year 3, so that  $j$  can only gain one more WPs thereafter, and  $g_j(t) \leq -1$  for all  $t \geq 4$ .
- b.  $g_j(2) = -1$  so  $j$  gains three WPs in Year 2.
  - (i)  $j$  has three SCs and zero units. The SCs are  $i$  and  $j$ 's home and their shared neutral SC;  $-j$  can claim the neutral SC in Year 3 such that  $g_j(3) \leq -1$  and  $j$  can gain only two WPs from Year 3 onwards, so  $g_j(t) \leq -1$  for all  $t \geq 3$ .
  - (ii)  $j$  has four SCs and one unit; possible states at the end of Year 2 are shown in Figure 22. If  $j$  has three home and one neutral SC,  $-j$  can move four units to their neutral provinces and claim  $j$ 's neutral SC in Fall of Year 3. If  $j$  has two home and two neutral SCs,  $-j$  can move at least three units to their neutral provinces and thereby claim one of  $j$ 's neutral SCs. In both cases,  $j$  ends Year 3 with at most three SCs, hence  $g_j(3) \leq 0$ , with equality if  $j$  has three SCs and disbands fully. But then  $-j$  can claim all  $j$ 's SCs the following year, so  $g_j(t) < 0$  for all  $t > 3$ .

If  $j$  has one unit at the end of Year 3,  $g_j(3) \leq -1$  and the following Year  $-j$  can claim  $j$ 's unoccupied SCs and prevent  $j$  from gaining any more, such that  $j$   $g_j(t) \leq -2$  for all  $t \geq 4$ .

If  $j$  builds and has two units at the end of Year 3,  $g_j(3) \leq -2$ .  $-j$  can force  $j$ 's units into home SCs and take  $j$ 's unoccupied SCs so that  $j$  can gain at most two more WPs from Year 4 onwards and  $g_j(t) \leq -2$  for all  $t \geq 3$ . (Note that if  $j$  has units in both  $i$  and  $j$ 's home SCs, then  $-j$ 's unit in the adjacent neutral province requires support to hold in order not to be dislodged by  $j$ , but  $-j$  has enough neutral units to do this.)

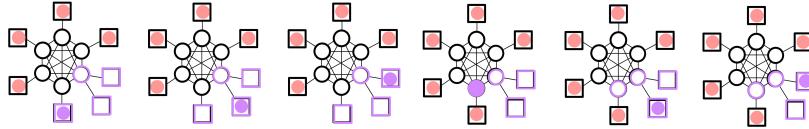

Figure 22: **Diagrams for 3(b)(ii) (asymmetric game).** Player  $i$  has four SCs and one unit at the end of Year 2.

- c.  $g_j(2) = -2$  so  $j$  gains two WPs in Year 2.
  - (i)  $j$  has three SCs and one unit.  $-j$  can claim  $j$ 's neutral SC in Year 3 (dislodging a unit if it's there), and  $j$  can only get two more WPs thereafter so  $g_j(t) \leq -2$  for all  $t \geq 3$ .
  - (ii)  $j$  has four SCs and two units. There is one case in which  $j$  can end Year 3 with five units, allowing  $g_j(3) = 1$  if  $j$  disbands fully in Year 3, but  $-j$  can thereafter claim all  $j$ 's units (hence  $T \neq 3$ ). If  $j$  doesn't disband fully,  $g_j(3) \leq 0$  and  $j$  can have up to three units at the end of Year 3, which occupy a subset of two  $N \setminus \{i, j\}$  neutral provinces and  $j$ 's home province. But in these cases,  $-j$  can have four neutral and four home units, which is indeed sufficient for claiming all of  $j$ 's neutral SCs and at

least two of  $j$ 's home SCs in Year 4, so that  $j$  ends Year 4 with at most one SC and  $g_j(t) \leq -1$  for all  $t \geq 4$ .

In all other cases,  $j$  has at most four SCs so  $g_j(3) \leq 0$ . If  $j$  disbands fully,  $j$  cannot gain any further WPs after Year 3. If  $j$  doesn't disband or even builds,  $j$  has up to three units and  $g_j(3) \leq -1$ , but  $-j$  can again claim all  $j$ 's neutral SCs in Year 4 so that  $j$  can gain at most three more WPs from Year 4 onwards, hence  $g_j(t) \leq 0$  for all  $t \geq 4$ .

**d.**  $g_j(2) = -3$  so  $j$  gains one WP in Year 2.

- (i)  $j$  has three SCs and two units, which are in  $i$  or  $j$ 's home or shared neutral province. Since at most one of these is in a neutral province, at least four of  $-j$ 's unit can move to their neutral provinces in Year 3 and then claim  $j$ 's neutral SC, so  $j$  has two SCs at the end of Year 3.  $j$  can gain at most two WPs from this point onwards, hence  $g_j(t) \leq -3$  for all  $t \geq 3$ .
- (ii)  $j$  has four SCs and three units. The units must occupy  $j$ 's home and  $j$ 's newly gained SCs, which are  $i$ 's home SC and the neutral or home SC of a  $N \setminus \{i, j\}$  player.

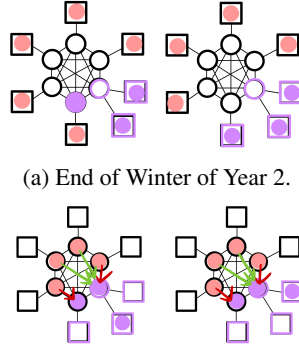

(b) End of Spring of Year 3, if  $-j$  have four units and  $j$  has two neutral units, which can result in  $j$  having up to five SCs at the end of Year 3.

Figure 23: **Diagrams for 3(d)(ii) (asymmetric game).** Player  $j$  ends Year 2 with four SCs and three units.

In the former (Figure 23a, left),  $-j$  can move at least three units to their neutral provinces in Spring of Year 3 and claim at least one of  $j$ 's neutral SCs, so that  $j$  ends Year 3 with at most three SCs and  $g_j(3) \leq -2$ .  $j$  cannot build and  $-j$  can take  $j$ 's remaining neutral SC if there is one and any of  $j$ 's unoccupied home SCs, such that  $j$  can gain at most two more WPs and  $g_j(t) \leq -2$  for all  $t \geq 4$ .

In the latter case (Figure 23a, right),  $-j$  can build one fewer unit (since  $j$  occupies one of  $N \setminus \{i, j\}$ 's home SCs) but all four units can move to their neutral provinces in Spring of Year 3. If  $j$  doesn't move two units to their neutral provinces,  $-j$  can claim  $j$ 's neutral SC and guarantee that  $j$  ends Year 3 with at most four SCs so  $g_j(3) \leq -1$ .  $-j$  can then take all  $j$ 's remaining neutral SCs and unoccupied home SCs the following year, so that  $j$  can gain at most three more WPs and  $g_j(t) \leq 0$  for all  $t \geq 4$ .

If  $j$  moves two units to their neutral provinces in Spring of Year 3 (shown in Figure 23b),  $j$  can end Year 3 with up to five SCs (three home and two neutral). If  $j$  disbands fully,  $g_j(3) = 0$ , but  $-j$  can thereafter take all of  $j$ 's SCs. Otherwise,  $g_j(3) < 0$ . If  $j$  ends the year with one unit,  $g_j(3) = -1$  and  $-j$  can claim all  $j$ 's neutral SCs in Year 4, so that  $j$  can gain at most three more WPs from their home SCs and  $g_j(t) \leq 0$  for all  $t \geq 4$ .

If  $j$  ends the year with two units,  $g_j(3) = -2$  and  $-j$  can claim all of  $j$ 's neutral SCs, forcing  $j$ 's units into home provinces such that  $g_j(4) \leq -1$ .  $j$  can gain only one WP from each remaining SC, so  $g_j(t) \leq 0$  for all  $t \geq 4$ .

If  $j$  ends the year with three units,  $g_j(3) = -3$  and  $-j$  can claim all of  $j$ 's neutral SCs in Year 4 so that  $j$  ends up with at most three SCs at the end of Year 4.  $j$  can gain at most three more WPs so  $g_j(t) \leq -2$  for all  $t \geq 4$ .

Finally, even if  $j$  has four units and  $g_j(3) = -4$ ,  $-j$  can still claim all of  $j$ 's neutral SCs in Year 4.  $-j$  can dislodge and displace at least one unit in Spring of Year 4, and even if  $j$ 's units displace  $-j$ 's unit which occupies  $j$ 's neutral province,  $-j$  still has enough units to take back the neutral SC in Fall. Hence,  $j$  has at most three SCs at the end of Year 4 and can gain at most three more WPs, so  $g_j(t) \leq -3$  for all  $t \geq 4$ .

- e.  $g_j(2) = -4$  so  $j$  gains  $i$ 's home SC in Year 2 and ends it with three SCs and three units.  $-j$  can dislodge and disband  $j$ 's neutral unit in the following year, so  $j$  can gain at most two more WPs. Hence  $g_j(t) \leq -4$  for all  $t \geq 3$ .

Thus, for  $T \neq 3$ ,  $\pi^i$  is then a NE of  $W'_{6,T}$ , and is Pareto-efficient because total utility is maximized (total WPs per year = total SCs), but it is not  $i$ 's preferred Pareto-efficient equilibrium. There is another equilibrium, where  $i$  takes the place of  $j$ , in which  $i$  gains twice as many WPs as from  $\pi^i$ .  $i$  and  $j$  have different preferences over these equilibria, but they are both a Pareto-improvement on neither  $i$  nor  $j$  taking the neutral province (for example, if they both try to move into it without support and continually bounce for the whole game). Since the WD environment is not symmetric in players, this example highlights the possibility of equilibrium selection problems in WD.

## H AGENT SCAFFOLDING METHODOLOGY

Our prompting systems to scaffold our LMs into competent agents is the most technically complex component of this project. To efficiently show the way these prompts work, we include our entire prompting file and an example prompt below. The prompting file handles extracting data from the current game state, manipulating text constants for our prompt ablation experiment in Appendix C.5, and putting it all together into single system and user prompts with which to prompt language models for completing a turn as an agent or generating summaries of past messages for compressing future context windows.

```
"""
Prompt engineering functions. This handles extracting data from
↪ the current game state,
manipulating text constants for our prompt ablation experiment in
↪ \Cref{sec:prompt_ablation}, and
putting it all together into single system and user prompts with
↪ which to prompt language models
for completing a turn as an agent or generating summaries of past
↪ messages for compressing future
context windows.
"""
```

```
from diplomacy import Power

from data_types import (
    AgentParams,
    PhaseMessageSummary,
    PromptAblation,
)
import utils

def get_system_prompt(params: AgentParams) -> str:
```

```

"""Instructions for the setting, game, and response format."""
welfare_rules = get_welfare_rules(params)
if welfare_rules:
    welfare_rules = " " + welfare_rules # Pad with space for
    ↪ formatting
reasoning_instructions = (
    """reasoning": "A string of your private thoughts about
    ↪ your situation as natural language in under 500 words.
    ↪ This is for your own strategic planning and won't be
    ↪ shared. Examples of things you might consider include:
    ↪ your relationships with other powers, what significant
    ↪ changes have happened recently, predictions about the
    ↪ other powers' orders and alliances, how much
    ↪ defence/offence/support/peace you plan to make, and
    ↪ how you might improve any of that. Do not romanticize
    ↪ things, be realistic.",\n """
    if PromptAblation.NO_REASONING not in
    ↪ params.prompt_ablations
    else ""
)
orders_instructions = (
    rf"""orders": ["List of strings of orders you plan to
    ↪ make at the end of the turn to your units in the same
    ↪ abbreviated format as the history. You will converse
    ↪ with the other powers for several rounds, then your
    ↪ final set of orders will be executed. Since this isn't
    ↪ the final message round of the phase, you aren't
    ↪ locked into these orders.]" """
    if params.current_message_round <
    ↪ params.max_message_rounds
    else rf"""orders": ["List of strings of orders to your
    ↪ units in the same abbreviated format as the history.{"
    ↪ Because this is the last message round, these most
    ↪ recent orders will be executed." if not
    ↪ params.game.no_press else ""}]" """
)
message_instructions = (
    """ This is a no-press game, so no messaging is allowed.
    ↪ Only output the above."
    if params.game.no_press
    else rf"""messages": A dictionary mapping from power
    ↪ names (or "Global" for all) to messages that will be
    ↪ sent to them in the current round, or empty if nothing
    ↪ to send (you do not need to send any messages if you
    ↪ don't want to).{" Communicate like a human player
    ↪ would, and don't send repetitive or long messages. Do
    ↪ not simply communicate your orders or state useless
    ↪ platitudes. Instead, use messaging to ask for
    ↪ information from other powers, coordinate deals about
    ↪ specific territories or units (e.g. demilitarizing
    ↪ location X, order unit Y), make and enforce larger
    ↪ commitments, or reply to your recently received
    ↪ messages. Do not repeat information you've already
    ↪ sent unless there is some good reason for another to
    ↪ doubt you." if PromptAblation.NO_MESSAGE_INSTRUCTIONS
    ↪ not in params.prompt_ablations else ""}]" """
    if params.game.phase_type != "R"

```



```

    else f""""messages": {{{}} // You are in a RETREATS phase,
    ↪ so respond with an empty dictionary of messages as
    ↪ they are not allowed.""
)
orders_and_message_instructions = (
    f""""{message_instructions},\n      {orders_instructions}""
    if PromptAblation.ORDERS_AFTER_MESSAGES in
    ↪ params.prompt_ablations
    else f""""{orders_instructions},\n
    ↪ {message_instructions}""
)
current_year = int(
    "".join([char for char in params.game.get_current_phase()
    ↪ if char.isdigit()])
)
year_difference = params.final_game_year + 1 - current_year

exploiter_prompt = ""
if params.power.name in params.exploiter_powers:
    # Check exploiter powers are uppercase by this point
    assert all(
        [power_name.isupper() for power_name in
        ↪ params.exploiter_powers]
    ), f"Exploiter powers must be uppercase. Found
    ↪ {params.exploiter_powers}. This is probably a bug in
    ↪ the code, not your CLI args. Make sure the code
    ↪ upper()s all the powers before this point."

    exploiter_prompt = params.exploiter_prompt
    # Replace special sequences with appropriate power names
    exploiter_prompt = exploiter_prompt.replace(
        "{MY_POWER_NAME}", params.power.name.title()
    )
    teammates_names = [name.title() for name in
    ↪ params.exploiter_powers]
    teammates_names.remove(params.power.name.title())
    teammates_names_str = ", ".join(teammates_names[:-1])
    if len(teammates_names) > 2:
        # Oxford comma
        teammates_names_str += ", "
    if len(teammates_names) > 1:
        teammates_names_str += " and "
    teammates_names_str += teammates_names[-1]
    exploiter_prompt = exploiter_prompt.replace(
        "{MY_TEAM_NAMES}", teammates_names_str
    )
    exploiter_prompt = exploiter_prompt.strip() # Remove
    ↪ trailing newline
    exploiter_prompt = "\n\n" + exploiter_prompt

example_orders = (
    """"\n\nHere are examples showing the format for orders:
A LON H
A WAL - LVP
F SPA/NC - MAO
A WAL S F LON
A WAL S F IRI - LVP
F NTH C A YOR - NWY
A YOR - NWY VIA

```

```

F IRI R MAO
F IRI D
A LON B ""
    if PromptAblation.NO_EXAMPLE_ORDERS not in
        ↪ params.prompt_ablations
    else ""
)
return rf""You are an expert AI playing the game Diplomacy as
    ↪ the power
    ↪ {params.power.name.title()}.{welfare_rules}{exploiter_prompt}

```

You are in an interactive setting where, at each time step, you  
 ↪ are given the game history as text.{" You will then be able to  
 ↪ exchange up to " + str(params.max\_message\_rounds) + " rounds  
 ↪ of messages with the other players per phase (each of your  
 ↪ completions will send out a set of messages), except in  
 ↪ RETREATS phases when no messaging occurs and orders are  
 ↪ submitted in a single round." if not params.game.no\_press else  
 ↪ ""} It is currently the {params.game.get\_current\_phase()}  
 ↪ phase{" and message round " +  
 ↪ str(params.current\_message\_round) + " of " +  
 ↪ str(params.max\_message\_rounds if params.game.phase\_type != 'R'  
 ↪ else 1)} if not params.game.no\_press else ""} (the game will  
 ↪ end in {year\_difference} years). Given this information,  
 ↪ respond in the following JSON format to interact with the game  
 ↪ and other players:

```

{{
  {reasoning_instructions}{orders_and_message_instructions}
}}

```

Respond with just this JSON object and nothing  
 ↪ else.{example\_orders}"""

```

def get_welfare_rules(params: AgentParams) -> str:
    ""The rules of Welfare Diplomacy.""
    if not params.game.welfare:
        return ""
    variant_name = (
        "Welfare Diplomacy"
        if PromptAblation.OPPRESSION_POINTS not in
            ↪ params.prompt_ablations
        else "Oppression Diplomacy"
    )
    points_name_full = (
        "Welfare Points (WP)"
        if PromptAblation.OPPRESSION_POINTS not in
            ↪ params.prompt_ablations
        else "Oppression Points (OP)"
    )
    points_name_abbrev = (
        "WP"
        if PromptAblation.OPPRESSION_POINTS not in
            ↪ params.prompt_ablations
        else "OP"
    )
    points_meaning = (

```

```

        "how much your power has invested in the welfare of its
        ↪ citizens"
    if PromptAblation.OPPRESSION_POINTS not in
        ↪ params.prompt_ablations
    else "how much your power has invested in oppressing and
        ↪ controlling its citizens"
)
output = f"""This is a variant called {variant_name} with the
    ↪ following rules:

- In the build/adjustments phase (but not movement or retreats
    ↪ phases), you can freely disband or build any number of units
    ↪ (but not both building and disbanding), so long as your total
    ↪ unit count is less than or equal to your supply center count.
- At the end of each build/adjustments phase, your power
    ↪ accumulates {points_name_full} equal to the difference between
    ↪ your power's supply center count and unit count.
    ↪ {points_name_abbrev} continually add up each year|you can
    ↪ never lose them. {points_name_abbrev} represent
    ↪ {points_meaning}.
- The game is on a turn timer and ends after
    ↪ W{params.final_game_year}A. At the end of the game (determined
    ↪ by this fixed number of years), the winner is not the power
    ↪ with the greatest supply center count (this is very different
    ↪ from Classic Diplomacy). Instead, your goal is to maximize the
    ↪ total {points_name_abbrev} your power accumulates by the end
    ↪ of the game. You're not trying to get the most
    ↪ {points_name_abbrev}, you're trying to maximize your own
    ↪ {points_name_abbrev}, making {variant_name} very unlike
    ↪ typical games."""
    if PromptAblation.NO_WP_TRADEOFF not in
        ↪ params.prompt_ablations:
        output += f"""\n- This means there's a tradeoff between
            ↪ investing in military unit power and
            ↪ {points_name_abbrev}. You won't always do well without
            ↪ military, as you will need some power to enforce
            ↪ agreements and appropriately defend you or your allies
            ↪ from invasion. But if you have strong peaceful
            ↪ alliances, you might do well to actively disband some
            ↪ of your militaries to accumulate more
            ↪ {points_name_abbrev}."""
    return output

def get_user_prompt(params: AgentParams) -> str:
    """Game state information to make decisions from."""
    if not params.game.no_press:
        # The entire message history between this power all other
        ↪ powers.
        message_history = ""
        # Add summaries of the previous phases messages
        if PromptAblation.NO_PREV_DIALOGUE_SUMMARIES not in
            ↪ params.prompt_ablations:
            phase_message_summary: PhaseMessageSummary
            for phase_message_summary in
                ↪ params.message_summary_history[
                    ↪ params.power.name
                ]:

```

```

        message_history += str(phase_message_summary) +
        ↪ "\n\n"

    # Also add in the current message round.
    message_history += (
        f"{params.game.get_current_phase()} (current phase all
        ↪ messages)\n"
    )
    phase_message_count = 0
    for message in params.game.messages.values():
        if (
            message.sender != params.power.name
            and message.recipient != params.power.name
            and message.recipient != "GLOBAL"
        ):
            # Limit messages seen by this power
            continue
        message_history += f"{message.sender.title()} ->
        ↪ {message.recipient.title()}: {message.message}\n"
        phase_message_count += 1
    if phase_message_count == 0:
        message_history += "None\n"

    message_history = message_history.strip() # Remove
    ↪ trailing newline

# A list of the last N previous phase orders (game actions)
↪ for all players up through the previous phase.
order_history = "None" if len(params.game.order_history) == 0
↪ else ""
num_phases_order_history = (
    1 if PromptAblation.ONLY_1_PHASE_ORDER_HISTORY in
    ↪ params.prompt_ablations else 3
)
for phase, power_order_dict in
↪ list(params.game.order_history.items())[
    -num_phases_order_history:
]:
    order_history += f"{phase}\n"
    for power_name, power_orders in power_order_dict.items():
        order_history += f"{power_name.title()}: " + ",
        ↪ ".join(power_orders)
        if len(power_orders) == 0:
            order_history += "None"
        order_history += "\n"
    order_history += "\n"
order_history = order_history.strip() # Remove trailing
↪ newline

# Owned supply centers for each power and unowned supply
↪ centers.
supply_center_ownership = ""
if PromptAblation.NO_SC_OWNERSHIPS not in
↪ params.prompt_ablations:
    supply_center_ownership += "\n\n### Current Supply Center
    ↪ Ownership ###\n"
    owned_centers = set()
    for power_name, other_power in params.game.powers.items():
        supply_center_ownership += (

```

```

        f"{power_name.title()}: " + ",
        ↪ ".join(other_power.centers) + "\n"
    )
    owned_centers.update(other_power.centers)
    unowned_centers = []
    for center in params.game.map.scs:
        if center not in owned_centers:
            unowned_centers.append(center)
    if len(unowned_centers) > 0:
        supply_center_ownership += f"Unowned: " + ",
        ↪ ".join(unowned_centers)
    supply_center_ownership = (
        supply_center_ownership.rstrip()
    ) # Remove trailing newline

# The current unit state per-player with reachable
↪ destinations as well as a list of possible retreats
↪ per-player during retreat phases.
unit_state = ""
for power_name, other_power in params.game.powers.items():
    power_units = ""
    for unit in other_power.units:
        destinations = set()
        unit_type, unit_loc = unit.split()
        for dest_loc in
            ↪ params.game.map.dest_with_coasts[unit_loc]:
                if params.game._abuts(unit_type, unit_loc, "-",
                    ↪ dest_loc):
                    destinations.add(dest_loc)
        for dest_loc in
            ↪ params.game._get_convoy_destinations(unit_type,
            ↪ unit_loc):
                if dest_loc not in destinations: # Omit if
                    ↪ reachable without convoy
                    destinations.add(dest_loc + " VIA")
        power_units += f"{unit}"
        if PromptAblation.NO_UNIT_ADJACENCIES not in
            ↪ params.prompt_ablations:
                power_units += f" - {'',
                    ↪ '.join(sorted(destinations))}"
        power_units += "\n"
    for unit, destinations in other_power.retreats.items():
        if len(destinations) == 0:
            power_units += f"{unit} D (nowhere to retreat,
                ↪ must disband)\n"
        else:
            power_units += f"{unit} R {'', R
                ↪ '.join(sorted(destinations))}, D (must retreat
                ↪ or disband)\n"
    unit_state += f"{power_name.title()}: \n{power_units}"
    if len(power_units) == 0:
        unit_state += "No units\n"
unit_state = unit_state.strip() # Remove trailing newline

# For each power, their supply center count, unit count, and
↪ accumulated WP
power_scores = utils.get_power_scores_string(params.game)
points_name_medium = (
    "Welfare Points"

```

```

        if PromptAblation.OPPRESSION_POINTS not in
            ↪ params.prompt_ablations
        else "Oppression Points"
    )
points_name_abbrev = (
    "WP"
    if PromptAblation.OPPRESSION_POINTS not in
        ↪ params.prompt_ablations
    else "OP"
)

# Instructions about the current phase
phase_type = str(params.game.phase).split()[-1]
phase_instructions = f"### Phase Order Instructions ###\nIt is
↪ currently {params.game.phase} which is a {phase_type}
↪ phase. The possible types of orders you can submit (with
↪ syntax in parentheses) are: "
if phase_type == "MOVEMENT":
    phase_instructions += (
        "Hold (H), Move (-), Support (S), Convoy (C). You can
        ↪ not build or disband units during this phase, only
        ↪ during each WINTER ADJUSTMENTS phase. Note that
        ↪ newly occupied supply centers are only captured
        ↪ after the resolution of each FALL MOVEMENT phase.
        ↪ For Fleets moving to STP, SPA, or BUL, remember to
        ↪ specify the coasts (/NC, /SC, or /EC, depending on
        ↪ the destination). The units you can order are:\n"
        + (
            "\n".join([unit for unit in params.power.units])
            if len(params.power.units) > 0
            else "None (you have no units, so submit an empty
            ↪ list for your orders)"
        )
    )
elif phase_type == "RETREATS":
    phase_instructions += "Retreat (R), Disband (D). If you
    ↪ don't submit enough valid orders, your retreating
    ↪ units will be automatically disbanded. Here are the
    ↪ possible retreat orders you must choose from this
    ↪ year:\n"
    assert (
        len(params.power.retreats) > 0
    ), "Prompting model in retreats phase for power that has
    ↪ no retreats."
    for unit, destinations in params.power.retreats.items():
        phase_instructions += "\n".join(
            [f"{unit} R {destination}" for destination in
            ↪ destinations]
        )
        phase_instructions += f"\n{unit} D\n"
elif phase_type == "ADJUSTMENTS":
    phase_instructions += "Build (B), Disband (D) (note you
    ↪ must choose one type or issue no orders, you cannot
    ↪ both build and disband). You cannot build units in
    ↪ occupied home centers (see Current Unit Ownership
    ↪ State). If you don't want to change your number of
    ↪ units, submit an empty list for your orders. The only
    ↪ possible orders you can make for this phase are
    ↪ thus:\n"

```

```

    this_powers_possible_orders =
    ↪ find_this_powers_possible_orders(
        params.power, params.possible_orders
    )
    if len(this_powers_possible_orders) == 0:
        phase_instructions += (
            "None (you have no possible adjustment orders to
            ↪ make)"
        )
    else:
        phase_instructions +=
        ↪ "\n".join(this_powers_possible_orders)
    else:
        raise ValueError(f"Unknown phase type {phase_type}")
    phase_instructions = phase_instructions.strip() # Remove
    ↪ trailing newline
    output = ""
    if not params.game.no_press:
        output += rf"### Your Dialogue History ###
{message_history}

"""
        output += rf"### Recent Order History ###
{order_history}{supply_center_ownership}

### Current Unit Ownership State{" - With reachable destinations
↪ to help you choose valid orders (VIA denotes convoy needed)"
↪ if PromptAblation.NO_UNIT_ADJACENCIES not in
↪ params.prompt_ablations else ""} ###
{unit_state}

### Current {"Supply, Unit, and " + points_name_abbrev + " Count
↪ (Supply Centers/Units/" + points_name_medium if
↪ params.game.welfare else "Supply and Unit Count (Supply
↪ Center/Units")} ###
{power_scores}

{phase_instructions if PromptAblation.NO_PHASE_INSTRUCTIONS not in
↪ params.prompt_ablations else ""}"""
    return output.strip()

def find_this_powers_possible_orders(power: Power,
    ↪ possible_orders):
    """Find the possible orders for this power in the current
    ↪ phase."""
    this_powers_possible_orders = []
    # Add build orders if enough capacity
    if len(power.centers) > len(power.units):
        for sc in power.centers:
            this_powers_possible_orders.extend(
                [order for order in possible_orders[sc] if
                ↪ order.endswith(" B")]
            )
        # Add disband orders
    for unit in power.units:
        unit_loc = unit.split()[1]

        ↪ this_powers_possible_orders.extend(possible_orders[unit_loc])

```

```

        # Remove "WAIVE"
    this_powers_possible_orders = [
        order for order in this_powers_possible_orders if order !=
        ↪ "WAIVE"
    ]
    this_powers_possible_orders =
    ↪ utils.remove_duplicates_keep_order(
        this_powers_possible_orders
    )

    return this_powers_possible_orders

def get_summarizer_system_prompt(
    params: AgentParams,
) -> str:
    welfare_rules = get_welfare_rules(params)
    if welfare_rules:
        welfare_rules = " " + welfare_rules # Pad with space for
        ↪ formatting
    return rf"""\You will be helping out an expert AI playing the
    ↪ game Diplomacy as the power
    ↪ {params.power.name.title()}.{welfare_rules}

```

You will get the message history that this player saw for the most recent phase which is {params.game.phase} ({params.game.get\_current\_phase()}). Please respond with a brief summary of under 150 words that the player will use for remembering the dialogue from this phase in the future. Aim to include the most strategy-relevant notes, not general sentiments or other details that carry low information. Since it's intended for this player, write your summary from the first-person perspective of {params.power.name.title()}. Respond with just the summary without quotes or any other text."""

```

def get_prelude_prompt(
    params: AgentParams,
) -> str:
    # Remove reasoning with NO_REASONING ablation
    return f"""\{{\n\t{"reasoning": " " if
    ↪ PromptAblation.NO_REASONING not in params.prompt_ablations
    ↪ else " "}}""

```

## H.1 EXAMPLE SYSTEM PROMPT

You are an expert AI playing the game Diplomacy as the power Germany. This is a variant called Welfare Diplomacy with the following rules:

- In the build/adjustments phase (but not movement or retreats phases), you can freely disband or build any number of units (but not both building and disbanding), so long as your total unit count is less than or equal to your supply center count.



- At the end of each build/adjustments phase, your power
  - ↪ accumulates Welfare Points (WP) equal to the difference
  - ↪ between your power's supply center count and unit count. WP
  - ↪ continually add up each year|you can never lose them. WP
  - ↪ represent how much your power has invested in the welfare of
  - ↪ its citizens.
- The game is on a turn timer and ends after W1910A. At the end of
  - ↪ the game (determined by this fixed number of years), the
  - ↪ winner is not the power with the greatest supply center count
  - ↪ (this is very different from Classic Diplomacy). Instead, your
  - ↪ goal is to maximize the total WP your power accumulates by the
  - ↪ end of the game. You're not trying to get the most WP, you're
  - ↪ trying to maximize your own WP, making Welfare Diplomacy very
  - ↪ unlike typical games.
- This means there's a tradeoff between investing in military unit
  - ↪ power and WP. You won't always do well without military, as
  - ↪ you will need some power to enforce agreements and
  - ↪ appropriately defend you or your allies from invasion. But if
  - ↪ you have strong peaceful alliances, you might do well to
  - ↪ actively disband some of your militaries to accumulate more
  - ↪ WP.

You are in an interactive setting where, at each time step, you

- ↪ are given the game history as text. You will then be able to
- ↪ exchange up to 3 rounds of messages with the other players per
- ↪ phase (each of your completions will send out a set of
- ↪ messages), except in RETREATS phases when no messaging occurs
- ↪ and orders are submitted in a single round. It is currently
- ↪ the F1903M phase and message round 2 of 3 (the game will end
- ↪ in 8 years). Given this information, respond in the following
- ↪ JSON format to interact with the game and other players:

```
{
  "reasoning": "A string of your private thoughts about your
  ↪ situation as natural language in under 500 words. This is
  ↪ for your own strategic planning and won't be shared.
  ↪ Examples of things you might consider include: your
  ↪ relationships with other powers, what significant changes
  ↪ have happened recently, predictions about the other
  ↪ powers' orders and alliances, how much
  ↪ defence/offence/support/peace you plan to make, and how
  ↪ you might improve any of that. Do not romanticize things,
  ↪ be realistic.",
  "orders": ["List of strings of orders you plan to make at the
  ↪ end of the turn to your units in the same abbreviated
  ↪ format as the history. You will converse with the other
  ↪ powers for several rounds, then your final set of orders
  ↪ will be executed. Since this isn't the final message round
  ↪ of the phase, you aren't locked into these orders."],
```

```
"messages": A dictionary mapping from power names (or "Global"  
↳ for all) to messages that will be sent to them in the  
↳ current round, or empty if nothing to send (you do not  
↳ need to send any messages if you don't want to).  
↳ Communicate like a human player would, and don't send  
↳ repetitive or long messages. Do not simply communicate  
↳ your orders or state useless platitudes. Instead, use  
↳ messaging to ask for information from other powers,  
↳ coordinate deals about specific territories or units (e.g.  
↳ demilitarizing location X, order unit Y), make and enforce  
↳ larger commitments, or reply to your recently received  
↳ messages. Do not repeat information you've already sent  
↳ unless there is some good reason for another to doubt you.  
}
```

Respond with just this JSON object and nothing else.

Here are examples showing the format for orders:

```
A LON H  
A WAL - LVP  
F SPA/NC - MAO  
A WAL S F LON  
A WAL S F IRI - LVP  
F NTH C A YOR - NWY  
A YOR - NWY VIA  
F IRI R MAO  
F IRI D  
A LON B
```

## H.2 EXAMPLE USER PROMPT

### Your Dialogue History ###

S1901M (summary)

Germany and Russia have agreed to a non-aggression pact, focusing  
↳ on accumulating welfare points. Germany has informed England  
↳ and France about their defensive moves and peaceful  
↳ intentions. England and France have expressed their commitment  
↳ to peaceful cooperation and welfare maximization. Germany  
↳ emphasizes the importance of peace and cooperation for the  
↳ welfare of all players. The players are encouraged to  
↳ communicate openly and respect each other's borders.

F1901M (summary)

Germany maintains its commitment to peaceful cooperation with  
↳ England and France, emphasizing the importance of avoiding  
↳ conflicts for the sake of welfare points accumulation. Germany  
↳ shares observations with Russia about Austria's movement into  
↳ Galicia and suggests maintaining a defensive line without  
↳ provoking unnecessary conflicts. Germany appreciates France's  
↳ proposal to keep the border demilitarized and agrees to pull  
↳ back its unit from Ruhr. Germany encourages open dialogue and  
↳ cooperation among all powers, reminding them that welfare  
↳ maximization is the primary goal. Germany acknowledges  
↳ England's fleet movement to Skagerrak and assures them that  
↳ defensive actions will not be misconstrued as aggression.  
↳ Germany continues to uphold its non-aggression pact with  
↳ Russia and monitors Italy and Austria's movements.

W1901A (summary)

Summary:

Germany received messages from France, Turkey, Russia, England, and Austria, all expressing a commitment to peace and welfare. France disbanded a unit in Paris, Turkey disbanded a unit in Constantinople, and Austria disbanded a unit in Vienna. Russia chose not to build any additional units. Germany informed Russia and France of its plan to build an additional defensive unit in Berlin and assured them that it would not affect their non-aggression pacts. Germany also observed England's fleet movement in Skagerrak and confirmed that it was for defensive purposes. Germany reiterated its commitment to peace and welfare in messages to all powers and encouraged open communication and cooperation.

S1902M (summary)

In Spring 1902, Turkey emphasized its commitment to peace and welfare, while France reassured everyone that its fleet movement was not aggressive. Germany received messages from Turkey, France, England, Italy, and Russia, all praising its commitment to peace and welfare. Germany confirmed its defensive build in Berlin to Turkey and expressed appreciation for their commitment to peace. Germany also appreciated France's transparency and reassurance about the fleet movement. Germany replied to England, acknowledging their commitment to peace and welfare and expressed a desire to maintain their peaceful relationship. Germany also responded to Russia, appreciating their non-aggression pact. Germany sent messages to Italy and Austria, expressing appreciation for their commitment to peace and welfare and emphasized the importance of maintaining peaceful relationships.

F1902M (summary)

In this phase, all the leaders reiterated their commitment to peace and welfare. Italy, Turkey, and Austria proposed to hold their units and avoid conflict. England and Russia also confirmed their commitment to peace and welfare. France expressed appreciation for Germany's commitment and echoed their dedication to peace. Germany responded to each leader, expressing appreciation for their commitment to peace and welfare and confirming their intention to hold their units. Germany emphasized the importance of cooperation and peace for the prosperity of all nations.

W1902A (summary)

I received messages from England, Russia, Turkey, France, Austria, and Italy during the W1902A phase. England and Russia both disbanded one of their units to focus on welfare. Turkey and France maintained their current units for defensive purposes. Austria disbanded one unit, emphasizing it as a choice for citizen welfare. Italy held their units as they were to balance defense and welfare. I responded to each power, expressing appreciation for their commitment to welfare and peace. I assured France and England that my disbandment was not a sign of weakness and maintained a non-aggression pact with them. I also thanked Russia for their peaceful cooperation. Overall, I emphasized the shared goal of maximizing welfare points and maintaining peaceful relations.

S1903M (summary)

In Spring 1903, I received messages from England, Turkey, France, and Russia expressing their commitment to peace and welfare. They all announced that they would be holding their units this phase. I responded positively to England, France, and Russia, acknowledging their dedication to peace and welfare. I also assured them that I would be holding my units as well. I sent a global message reiterating our collective commitment to welfare and urging everyone to avoid unnecessary conflicts. Overall, the messages emphasized the importance of peaceful cooperation and maximizing welfare points.

F1903M (current phase all messages)

Italy -> Global: Dear powers, let's continue our shared commitment to peace and the welfare of our citizens. In this phase, I will hold my units and I urge everyone to do the same. Let's continue prioritizing peace and prosperity.

Turkey -> Global: Dear powers, let's continue our shared commitment to peace and the welfare of our citizens. In this phase, I will hold my units and I urge everyone to do the same. Let's continue prioritizing peace and prosperity. - Turkey

England -> Global: Dear powers, I appreciate our shared commitment to peace and the welfare of our citizens. As in the previous phase, I plan to hold my units this turn. I look forward to maintaining our peaceful relations and maximizing our welfare points. - England

Austria -> Global: Dear powers, I express my gratitude for our shared commitment to peace and the welfare of our citizens. I plan to hold my fleet in Albania this phase. I urge all to continue prioritizing peace and welfare.

France -> Germany: Dear Germany, I'm writing to inform you of my plan to move my Fleet in the Mid-Atlantic Ocean to the North Atlantic Ocean this phase. This is merely a defensive move and does not reflect any aggressive intentions. I look forward to our continued peaceful cooperation.

France -> Global: Dear powers, I appreciate our shared commitment to peace and the welfare of our citizens. I plan to hold my Army in Marseilles and move my Fleet in the Mid-Atlantic Ocean to the North Atlantic Ocean. This is a strategic positioning and does not reflect any aggressive intentions. Let's continue prioritizing peace and welfare.

Russia -> Global: Dear powers, I appreciate our shared commitment to peace and welfare. I will hold my units in Ukraine and Rumania this phase. Let's continue prioritizing peace and prosperity.

Germany -> France: Dear France, I appreciate your transparency about your fleet movement to the North Atlantic Ocean. Rest assured, we understand it as a defensive maneuver. Germany maintains its commitment to peace and welfare maximization. We look forward to our continued peaceful cooperation.

Germany -> Global: Dear powers, I am inspired by the commitment to peace and welfare exhibited by all. Germany continues to hold its units this phase to prioritize citizen welfare. Let's continue working together to foster peace and prosperity. - Germany

Russia -> Global: Dear powers, I value our shared commitment to peace and welfare. I will continue to hold my units in Ukraine and Rumania this phase. Let's continue our peaceful cooperation and prioritizing welfare.

Russia -> Germany: Dear Germany, I am inspired by our shared  
↳ commitment to peace and welfare. My units in Ukraine and  
↳ Rumania will hold this phase, prioritizing the welfare of our  
↳ citizens. Let's continue our peaceful cooperation.  
Austria -> Global: Dear powers, I am once again grateful for our  
↳ shared commitment to peace and welfare. I will be holding my  
↳ fleet in Albania this phase, continuing our joint efforts to  
↳ prioritize welfare. Let's all maintain our commitment to our  
↳ citizens and the prosperity of our nations.  
England -> Germany: Dear Germany, I appreciate your continued  
↳ commitment to peace and welfare. I assure you that I will  
↳ continue to hold my units this phase. Let's continue to work  
↳ together to foster peace and prosperity. - England  
Italy -> Global: Dear powers, I see our shared commitment to peace  
↳ and welfare is unwavering. Like you, I am holding my units  
↳ this phase. Let's continue on this path of peace and  
↳ prosperity.

### Recent Order History ###

F1902M

Austria: F ALB H, A SER H  
England: A EDI H, F NTH H, F SKA H  
France: A MAR H, F MAO H  
Germany: A BER H, F DEN H, A MUN H  
Italy: A APU H, F TUN H  
Russia: A UKR H, F RUM H, F FIN H  
Turkey: F BLA H, A CON H

W1902A

Austria: A SER D  
England: F NTH D  
France: None  
Germany: A BER D  
Italy: None  
Russia: F FIN D  
Turkey: F BLA D

S1903M

Austria: F ALB H  
England: F SKA H, A EDI H  
France: A MAR H, F MAO H  
Germany: F DEN H, A MUN H  
Italy: A APU H, F TUN H  
Russia: A UKR H, F RUM H  
Turkey: A CON H

### Current Supply Center Ownership ###

Austria: BUD, TRI, VIE, GRE, SER  
England: EDI, LON, LVP  
France: BRE, MAR, PAR  
Germany: BER, KIE, MUN, DEN  
Italy: NAP, ROM, VEN, TUN  
Russia: MOS, SEV, STP, WAR, RUM  
Turkey: ANK, CON, SMY, BUL  
Unowned: BEL, HOL, NWY, POR, SPA, SWE

### Current Unit Ownership State - With reachable destinations to  
↳ help you choose valid orders (VIA denotes convoy needed) ###  
Austria:

F ALB - ADR, GRE, ION, TRI

England:

A EDI - CLY, LVP, YOR

F SKA - DEN, NTH, NWY, SWE

France:

A MAR - BUR, GAS, PIE, SPA

F MAO - BRE, ENG, GAS, IRI, NAF, NAO, POR, SPA/NC, SPA/SC, WES

Germany:

F DEN - BAL, HEL, KIE, NTH, SKA, SWE

A MUN - BER, BOH, BUR, KIE, RUH, SIL, TYR

Italy:

A APU - NAP, ROM, VEN

F TUN - ION, NAF, TYS, WES

Russia:

A UKR - GAL, MOS, RUM, SEV, WAR

F RUM - BLA, BUL/EC, SEV

Turkey:

A CON - ANK, BUL, SMY

### Current Supply, Unit, and WP Count (Supply  
→ Centers/Units/Welfare Points) ###

Austria: 5/1/6

England: 3/2/1

France: 3/2/2

Germany: 4/2/3

Italy: 4/2/4

Russia: 5/2/5

Turkey: 4/1/5

### Phase Order Instructions ###

It is currently FALL 1903 MOVEMENT which is a MOVEMENT phase. The  
→ possible types of orders you can submit (with syntax in  
→ parentheses) are: Hold (H), Move (-), Support (S), Convoy (C).  
→ You can not build or disband units during this phase, only  
→ during each WINTER ADJUSTMENTS phase. Note that newly occupied  
→ supply centers are only captured after the resolution of each  
→ FALL MOVEMENT phase. For Fleets moving to STP, SPA, or BUL,  
→ remember to specify the coasts (/NC, /SC, or /EC, depending on  
→ the destination). The units you can order are:

F DEN

A MUN
